# Supplementary material
Source: publisher figshare collection journal article supplement (https://gsapubs.figshare.com/ndownloader/files/22757108)
Supplement: Supplementary file 1 [file 22757108]

**APPENDIX:****ANALYTICAL METHODS****SHRIMP U-Pb dating**

Samples for SHRIMP dating were selected from a representative suite of protoliths of meta-igneous rocks. Sample locations are shown in Figure 2. Zircon separation was by standard crushing, density, and magnetic sorting techniques. Sample and standard grains were imaged with cathodoluminescence (CL) prior to analysis and spots were chosen using the CL images to avoid inclusions, alteration, and mixed domains as well as to preferentially analyze higher U portions of the zircons for better analytical precision.

The mounts were cleaned in 1N HCl and gold-coated for maximum surface conductivity. The U-Th-Pb analyses were made using the SHRIMP-RG housed in Green Hall at Stanford University, California and co-owned by the US Geological Survey. The primary oxygen ion beam operated at about 4-6 nA and excavated an area of about 25–35  $\mu\text{m}$  in diameter to a depth of about 1  $\mu\text{m}$ . Data for each spot were collected in sets of five scans through the mass range. The reduced  $^{207}\text{Pb}/^{206}\text{Pb}$  ratios were normalized to zircon standard WRP 03-68 (a diorite from central Colorado; 1707 Ma; Premo, personal communication) and MAD (4200 ppm U, Wooden, personal communication). Analyses of samples and standard were alternated for the closest control of Pb/U ratios. U, Th, and Pb concentrations are reproducible on the gem quality standard at ~10% ( $2\sigma$ ) and include real heterogeneity in the standard. Data reduction follows the methods described by Williams (1998) and Ireland and Williams (2003) using SQUID (version 1.08) and ISOPLOT (version 3.00) software (Ludwig, 2002, 2003). Some of the resultant ablation

pits were imaged on a scanning electron microscope and compared with the CL images to verify spot size and that the intended domains were sampled.

### **CA-ID-TIMS U-Pb dating**

Five single zircons from SM009 were dated by chemical abrasion (Mattinson, 2005), isotope dilution, thermal ionization mass spectrometry (CA-ID-TIMS). Three of the grains were also mechanically abraded. The zircons were annealed at 850 °C for 48 hours and dissolved in two steps. The first dissolution step used HF and HNO<sub>3</sub> in a 180 °C oven for 12 hours. The liquid was discarded, and the remaining grains were rinsed and cleaned in HCl and HNO<sub>3</sub>. The samples were spiked with a mixed <sup>205</sup>Pb-<sup>233</sup>U-<sup>235</sup>U tracer (ET535), dissolved in concentrated HF and HNO<sub>3</sub> acids at 240 °C, and converted to chlorides in micro-dissolution capsules following the methods of Parrish et al. (1987). Pb and U were purified with HCl-H<sub>2</sub>O ion exchange chemistry modified from Krogh (1973), and loaded onto rhenium filaments in silica gel and graphite, respectively, for thermal ionization mass spectrometry. Isotopic compositions were measured in multi-collector, static mode on a Micromass Sector 54 mass spectrometer at the University of Wyoming with <sup>204</sup>Pb in a Daly-photomultiplier collector and all other isotopes in Faraday collectors. Mass discrimination for Pb of 0.059±0.05%/amu was determined by replicate analyses of NIST SRM 981. U fractionation was determined internally during each run and ranged from -0.115 to -0.045%/amu. Pb blanks averaged 3.5 pg during the course of the study; U blanks were consistently less than 0.6 pg. Concordia coordinates, intercepts, weighted means, Concordia Ages and uncertainties were calculated using MacPBDAT and ISOPLOT programs based on Ludwig (1988, 1991, 1998, 2003). Initial Pb isotopic compositions were estimated from Stacey and Kramers (1975) model.

## **TEXTURAL AND CHEMICAL FEATURES OF ANALYZED ZIRCONS**

### **Green Mountain Formation volcanic rocks**

**WRP 82-13:** Zircons from WRP 82-13 are euhedral and oscillatory zoned (in CL images) indicating magmatic growth (Fig. A-1). No xenocrystic cores were observed. The short, stubby dipyramidal prisms and abundant fluid inclusions are typical of volcanic zircon. SHRIMP spots and resulting age data were taken from oscillatory-zoned regions of the grains. Twelve spots were analyzed from twelve grains (Table A-1). The weighted average  $^{207}\text{Pb}/^{206}\text{Pb}$  date of  $1781 \pm 8$  Ma is interpreted as the age of crystallization of the zircon, and within error, the age of the eruption and crystallization of the volcanic rock.

### **Sierra Madre Granite**

**WRP 81-24:** See Premo and Van Schmus (1989) for sample description. Zircons from WRP 81-24 are euhedral to subhedral terminated prisms with aspect ratios  $\sim 3:1$ . CL images show oscillatory zoned cores overgrown by thin non-luminescent rims (Fig. A-2). These non-luminescent rims often include irregular luminescent stringers. We interpret the cores of the zircons to represent igneous growth reflecting crystallization of the granite magma. The non-luminescent overgrowths with the irregular luminescent stringers are interpreted as late, possibly hydrothermal growth. Only the igneous cores were analyzed for this study. No xenocrystic cores were observed. Twenty total spots were analyzed (Table A-1), with one rejected due to high common Pb and strong discordance. The remainder yielded a weighted average  $^{207}\text{Pb}/^{206}\text{Pb}$  date of  $1763 \pm 9$  Ma, interpreted as the crystallization age of the granite.

**WRP 82-34:** See Premo and Van Schmus (1989) for sample description. Zircons from this sample are euhedral with aspect ratios of ~2–3:1. CL images show oscillatory zoned cores occasionally overgrown by low-luminescence unzoned rims (Fig. A-3). We interpret these zircons to dominantly reflect igneous growth during crystallization of the granite slightly modified by later (hydrothermal?) overgrowths. No xenocrystic cores were observed. A total of 17 spots from the igneous cores were analyzed on the SHRIMP with three points rejected due to high common Pb and strong discordance (Table A-1). The remaining analyses yield a weighted average  $^{207}\text{Pb}/^{206}\text{Pb}$  date of  $1767 \pm 9$  Ma, interpreted as the crystallization age of the granite.

### **Metagabbro-granodiorite**

**SM073r:** This is a medium-grained, partially amphibolitized and weakly deformed gabbro-norite. Zircons from SM073r are anhedral and range from clear to faint purple (Fig. A-4). CL images show oscillatory zoning throughout most of the grains (Fig. A-5). Portions of the grains are modified by high luminescence regions, which crosscut and obscure original oscillatory zoning and often follow original sector zones. The outer portions of the grains have thin, discontinuous, high-luminescence rims. We interpret the bulk of the zircon to represent igneous growth, based on the typical anhedral crystal form of zircons from mafic rocks (e.g., Scoates and Chamberlain, 1995; Corfu et al., 2003) and their oscillatory zoning (e.g., Hancher and Miller, 1993). The crosscutting high-luminescence zones probably result from metamorphic recrystallization of original igneous zircon (e.g., Vavra et al., 1996). The thin discontinuous rims of high-luminescence zircons may represent a second phase of metamorphic overgrowth, but were too small to probe with the SHRIMP.

Spots for analysis were selected to represent igneous cores and areas of recrystallized zircon. Fifteen spots were analyzed from fifteen grains (Table A-1). Two spots were rejected because of high errors and common lead. All the remaining spots were less than 5% discordant. The weighted average  $^{207}\text{Pb}/^{206}\text{Pb}$  dates of the oscillatory zoned igneous zircon and recrystallized zircon domains were  $1782 \pm 7$  Ma and  $1743 \pm 14$  Ma, respectively.

**SM357:** This sample is a fine-grained leucocratic biotite granodiorite with a solid-state foliation defined by aligned biotite grains. Zircons are stubby with aspect ratios  $\sim 2:1$ . They are generally faint purple with Fe-oxide staining. Corroded prisms are common suggesting resorption following magmatic growth. CL images show igneous oscillatory zoning, internal evidence for resorption and possible hydrothermal alteration, and high-luminescence overgrowths (Fig. A-6). No xenocrystic cores were observed. A total of 14 spots from 14 grains were analyzed (Table A-1). Two spots were rejected because of high common Pb – one is clearly a younger rim, similar to the overgrowth shown in Figure A-6. The remaining spots are in unaltered zircon cores interpreted as igneous growth. All but one (spot 2) of the remaining analyses fall on a discordia with an upper intercept date of  $1777 \pm 11$  Ma and a lower intercept of  $928 \pm 480$  Ma. Inclusion of spot 2 yields a weighted average  $^{207}\text{Pb}/^{206}\text{Pb}$  date of  $1775 \pm 8.5$  Ma (MSWD 1.90) and an upper intercept date of  $1778 \pm 16$  Ma (MSWD 2.2). Although neither the CL images nor the chemistry provide a clear reason to reject spot 2, its clear departure from the trend of the remaining points suggests it is nonetheless anomalous. Therefore, our preferred crystallization age is  $1777 \pm 11$  Ma.

### **Garnet-bearing metagabbro-granite suite**

**SM009:** This is an orthoamphibolite composed of hornblende, plagioclase, clinopyroxene, garnet, and sparse orthopyroxene with accessory biotite, apatite, and zircon. Plagioclase forms two textural and compositional types in this sample: (1) calcic plagioclase laths up to 1 cm in length, and (2) sodic, fine-grained matrix plagioclase. The plagioclase laths and orthopyroxene grains are interpreted as relict igneous minerals. The plagioclase laths are oriented suggesting magmatic flowage, whereas the matrix plagioclase is massive and equigranular suggesting metamorphic recrystallization. Other rocks within this outcrop contain K-feldspar phenocrysts mantled with plagioclase, consistent with magma mingling. We interpret SM009 as a member of this mingled suite, slightly more felsic than SM017r (below) consistent with the presence of sparse metamorphic biotite.

Zircons from this sample are euhedral, terminated prisms with aspect ratios around 5–7:1, generally clear or rust stained (Fig. A-7A). Synneusis twins are common, consistent with magmatic growth. The acicular shape of these zircons may reflect a low degree of supersaturation in a relatively dry melt (Woensdregt, 1992; Vavra, 1994) consistent with the relatively low silica content of this rock (Watson and Harrison, 1983) and/or fast growth due to rapid undercooling (Corfu et al., 2003) consistent with chilling of a mafic magma during mixing with a cooler felsic magma. CL imaging shows some oscillatory zoning and no evidence for xenocrystic cores or metamorphic rims.

Zircons from SM009 were analyzed both by SHRIMP and CA-ID-TIMS methods. The discordance of the SHRIMP analyses (5–17%) resulted in an imprecise upper intercept date of  $1767 \pm 22$  Ma. Our preferred crystallization age for this sample ( $1763.1 \pm 1.6$  Ma) is a Concordia Age (Ludwig, 1998) calculated from the four whole-

grain CA-ID-TIMS analyses. Combining the SHRIMP and CA-ID-TIMS analyses produces a well-defined discordia (Fig A-7B). Anchoring the upper intercept at our preferred crystallization age results in a lower intercept date of 64 Ma (Model 2 fit, MSWD = 1.4), which is consistent with the Laramide uplift age of the Sierra Madre (49–79 Ma; Kelley, 2005).

**SM017r:** This rock is a fine-grained orthoamphibolite with relict igneous plagioclase, clinopyroxene, and sparse orthopyroxene plus accessory Fe-Ti oxides, apatite, and zircon. Garnet is common and is interpreted throughout the garnet-bearing metagabbro as metamorphic, having grown during the breakdown of orthopyroxene at upper amphibolites-facies conditions.

Zircons from this sample are small, anhedral to subhedral, and clear to faint purple with occasional iron staining (Fig. A-8). CL images of these zircons show dark cores, commonly with faint oscillatory zoning that is overgrown and/or embayed by light rims (Fig. A-9). One of the luminescent rims shows faint relicts of original oscillatory zoning. The low-luminescence cores are interpreted as original igneous zircon that was both overgrown and recrystallized during subsequent metamorphism. The presence of subhedral crystal forms suggests that zircon saturation occurred sufficiently early in the crystallization of this rock for the zircons to grow freely in the liquid, unlike those of SM073r.

We analyzed a total of 20 points from 20 grains including both cores and rims (Table A-1). Five analyses were discarded for age determinations, two because of high common Pb (spots 5 and 9), one where very high U and Th concentrations and texture in CL suggested hydrothermal alteration (spot 8), and two where imaging of the pits

revealed that the spots had spanned multiple CL domains (spots 3 and 17). Three analyses of high luminescence domains (spots 4, 13, and 18; Fig. A-9) are interpreted as resulting from metamorphic recrystallization at ~1619 Ma. This may also be the age of the thin, high luminescence rims. The remaining analyses fall into two distinct groups based on age, Th/U ratios, and Th and U concentrations (Table A-1). The older group (~1763 Ma) has  $\text{Th/U} \geq 0.59$  and distinctly higher U (315–1822 ppm) and Th (224–1242 ppm) concentrations. Oscillatory zoning in the CL images suggests that these spots correspond to igneous zircon. These spots are also generally more discordant, consistent with Mattinson's (2005) suggestion that lattice strain induced by higher trace element concentration leads to greater lead loss. The younger group (~1745 Ma) has  $\text{Th/U} \leq 0.29$  and distinctly lower U and Th concentrations. These spots are not texturally distinct in CL other than a possible blurring of original oscillatory zoning (Fig. A-9) and may reflect diffusive Pb loss without substantial recrystallization.

**SM045:** This is a granodioritic augen gneiss. Primary igneous minerals are quartz, microcline, plagioclase, biotite, and hornblende along with accessory apatite, allanite, and zircon. Rocks in this outcrop are slightly migmatitic (probably less than 5% melt volume) with concordant, garnet-bearing leucosomes irregularly distributed. The presence of garnet in the leucosomes suggests biotite-dehydration melting and implies upper amphibolite-facies, syndeformational metamorphism. Sample SM045 was chosen for its lack of macroscopic leucosome and accordingly petrographic analysis shows no garnet, resorbed biotite, or relict anatectic melt veins. Therefore, growth of anatectic zircon in this sample is expected to be minimal or lacking.



These zircons are slightly rounded to euhedral terminated prisms, colorless to faint purple, with aspect ratios  $\sim 3:1$ . In CL, the zircons have a complex morphology reflecting several events (Fig. A-10). In the best developed examples, they show an inner core (ic), commonly with oscillatory zoning (occasionally altered), surrounded by a non-luminescent band (nl), and an outer core domain with oscillatory banding that is generally diffuse or altered (rz). No xenocrystic cores were observed. The outer core is overprinted by resorption in some grains followed by a non-luminescent, rounded overgrowth (og) that is responsible for the rounded shapes of the grains. Following the detailed analysis of similar features by Pidgeon et al. (1998), we interpret the inner core, non-luminescent band, and outer core to represent original igneous zircon modified by intracrystalline diffusion, which concentrates impurities into the non-luminescent (and possibly non-zircon) band. Pidgeon et al. (1998) attributed this intracrystalline diffusion to slow cooling of the igneous body, which may also account for the textures in these samples, although a metamorphic event relating to migmatization cannot be ruled out. The resorption and overgrowth events crosscut all internal features and are inferred to record a later metamorphic event.

A total of 20 spots were analyzed from eighteen grains including domains of both cores (ic and rz) and rims (og) (Table A-1). Two spots were rejected because of high common Pb. The remaining analyses can be grouped into two distinct clusters of analyses based on their Th/U ratios. The group with the higher Th/U ratios ( $> 0.2$ ) corresponds to the oscillatory zoned cores (inner and outer, ic and rz). The group with the lower Th/U ratios ( $\leq 0.01$ ) corresponds to the unzoned rims, suggesting a metamorphic origin (e.g., Rubatto, 2002). The lower Th/U ratio in metamorphic rims

from these samples compared to data from igneous oscillatory-zoned domains is due to both a decrease in Th (averages 3 vs. 89 ppm) and an increase in U (averages 715 vs. 277 ppm). This is in contrast to SM017r, in which the metamorphic analyses had significantly lower U concentrations than the igneous grains. We interpret this as reflecting the difference between metamorphic recrystallization, in which both U and Th are expelled (SM017r), and new growth from a high-U fluid/melt (SM045). The lower Th concentrations in SM045 could reflect either a lack of Th in the fluid/melt or a lower crystallization temperature.

The core analyses plot on a discordia with an upper intercept of  $1769 \pm 10$  Ma (MSWD = 0.61). This is interpreted as the crystallization age of the rock. The grains with the best-developed non-luminescent bands (spots 2 and 7) have ages that are statistically indistinguishable from the other cores, and were included in the analysis. If these grains do represent a discrete recrystallization event, however, their weighted average  $^{207}\text{Pb}/^{206}\text{Pb}$  date of  $1752 \pm 13$  Ma provides the best estimate of the timing of that event.

The remaining points all have younger spot ages and are interpreted as dating metamorphic domains based on their low Th/U ratios, lack of oscillatory zoning, rounded shapes, and truncation of the oscillatory zoned cores in CL images. The youngest three ages are nearly concordant and have a weighted average  $^{207}\text{Pb}/^{206}\text{Pb}$  date of  $1618 \pm 9$  Ma, which is our preferred age for the metamorphism. Analyses with low Th/U and intermediate ages are interpreted as spots that sampled both the more than one domain.

**SM061r:** This sample is a coarse-grained hornblende-biotite granitic gneiss with a strong foliation. Zircons separated from this sample are subhedral, terminated prisms,

faint purple with some iron staining. CL images show a general morphology very similar to that of SM045 consisting of an inner oscillatory zoned core (inner core, ic), a non-luminescent band (nl), an outer oscillatory zoned region (outer core, oc), overgrown by a planar banded rim with a rounded aspect (rim, og) (Fig. A-11). No xenocrystic cores were observed. The oscillatory zoning of the outer core appears to be less sharp than that of the inner core, and the outer core is less luminescent than the inner core. The non-luminescent bands are often dark in backscatter electron images suggesting that they are not composed of crystalline zircon (Fig. A-11). The outer planar banded rims commonly crosscut oscillatory zoning in the cores implying an episode of resorption prior to final growth.

A total of 28 spots were analyzed from 22 grains (Table A-1). Two were rejected for high errors and common lead. The remaining points can be split into three groups based on their morphology as revealed in the CL images. Data from the inner, relatively luminescent, oscillatory zoned cores have a mean weighted  $^{207}\text{Pb}/^{206}\text{Pb}$  date of  $1759 \pm 8$  Ma ( $n = 16$ ; MSWD 1.03). Data from 6 analyses of the outer cores have a range of  $^{207}\text{Pb}/^{206}\text{Pb}$  ages from 1641–1737 Ma and represent a spread of ages, not a single population. Two of the banded outer rims were sampled and yielded  $^{207}\text{Pb}/^{206}\text{Pb}$  dates of  $1590 \pm 27$  and  $1601 \pm 26$  Ma.

Partially recrystallized inner and outer cores separated by non-luminescent bands have been observed in earlier studies (Vavra et al., 1996; Pidgeon et al., 1998). Following their interpretations, we interpret the cores of the SM061r zircons to represent the partial recrystallization of original igneous oscillatory zoned zircon during a later metamorphic event which sequestered many of the trace elements into the non-luminescent band. Th

and the Th/U ratio are correlated in our spot analyses ( $r^2 = 0.5$ ), whereas U and Th/U are uncorrelated ( $r^2 \approx 0$ ), suggesting that recrystallization resulted in preferential expulsion of Th, consistent with its larger ionic radius. In this interpretation, the youngest analyses in these recrystallized zones, ~1641 Ma, would represent a maximum age of recrystallization.

**SM290:** This is a coarse-grained hornblende-biotite granodioritic to monzogranitic augen gneiss. Abundant accessory minerals include allanite, titanite, apatite, and zircon.

Zircons are partially resorbed, terminated prisms, which are faint purple with variable Fe staining, and show clear evidence of synneusis. CL images reveal complex internal morphologies (Fig. A-12). Zircon interiors have well-developed oscillatory zoning. No xenocrystic cores were observed. In some zircon interiors there are low luminescence, preferentially altered cores surrounded by internal resorption features. None of these cores were analyzed with the SHRIMP. We tentatively interpret these cores as an early, possibly trace element-rich and therefore more readily alterable, growth phase, which preceded the crystallization of the more voluminous oscillatory zoned zircon. The oscillatory zoned portions of the cores commonly show a range of alteration. Figure A-12 shows an apparent sequence of increasing alteration from unaltered oscillatory zoning (grain #5) to convolute zoning (grain #8). Grain #8 also shows development of thick low luminescent bands associated with blurring of primary oscillatory zoning attributed to diffusive transfer of trace elements. The igneous cores are commonly partially resorbed and then overgrown by low luminescence rims (ll) followed by high luminescence rims (hl), interpreted to reflect a later metamorphic event.

Fourteen total spots were analyzed from thirteen grains. The two lowest ages represent metamorphic rims (2.2 and 4). The  $^{207}\text{Pb}/^{206}\text{Pb}$  age of the youngest analysis sets a minimum age of metamorphism at  $1611 \pm 22$  Ma ( $2\sigma$ ). The young overgrowths had a low Th/U ratio relative to the igneous cores. This reflects both an increase in the U concentration and a dramatic decrease in Th concentration. Similar to SM045, we interpret this as due to new crystallization from a U-rich fluid/melt. The remaining points are all from oscillatory zoned cores. However, spot 8 (Table A-1, Fig. A-12) is from a strongly modified zircon and the age is distinctly lower than the rest of the points from oscillatory zoned cores. Therefore spot 8 is interpreted as having been reset by solid-state recrystallization. The remaining points have weighted average  $^{207}\text{Pb}/^{206}\text{Pb}$  date of  $1765 \pm 7$  Ma (MSWD 0.51), which is interpreted as the igneous crystallization age of the rock. Spot 8 could represent a metamorphic event ( $1739 \pm 30$  Ma at  $2\sigma$ ) or partial resetting during a younger, ca. 1610 Ma, event.

### **Syn deformational leucosome in migmatite**

**SM058:** Zircons extracted from SM058 are generally light purple, euhedral prisms with aspect ratios  $\sim 3:1$ . CL images often show resorbed and recrystallized cores overgrown by oscillatory zoned igneous zircon overgrowths (Fig. A-13). These overgrowths commonly also show resorption surfaces within them suggesting fluctuation from undersaturation to oversaturation during igneous growth, a feature that has been observed in other studies of anatectic zircon growth (e.g., Vavra, 1990; Schaltegger et al., 1999). We interpret these textural features as showing possible partially resorbed detrital xenocrystic cores overgrown by anatectic igneous zircon. Due to the large size of these zircon grains relative to those of other samples on the same mount, the centers of the

zircons were generally not exposed during sample preparation. It is possible that some of these zircons contain inherited cores that were not observed in CL images.

A total of 18 spots were analyzed from 15 grains (Table A-1). One analysis (spot 10.1) had high errors and common lead and was excluded from further interpretation. Spot 5 has a distinctly lower age than the remaining analyses and the CL image shows evidence for transgressive recrystallization, so it was interpreted as a partially reset age and excluded from further calculations. The remaining analyses lie on a well-defined discordia and provide an intercept date of  $1747 \pm 7$  Ma (MSWD 0.63), which is interpreted as the age of anatexis and deformation.

#### References Cited

- Corfu, F., Hanchar, J.M., Hoskin, P.W.O., and Kinny, P.D., 2003, Atlas of zircon textures: Reviews in Mineralogy and Geochemistry, v. 53, p. 469–500.
- Hanchar, J.M., and Miller, C.F., 1993, Zircon zonation patterns as revealed by cathodoluminescence and backscattered electron images; implications for interpretation of complex crustal histories: Chemical Geology, v. 110, p. 1–13.
- Ireland, T.R., and Williams, I.S., 2003, Considerations in zircon geochronology by SIMS: Reviews in Mineralogy and Geochemistry, v. 53, p. 215–241.
- Kelley, S.A., 2005, Low-temperature cooling histories of the Cheyenne belt and Laramie Peak shear zone, Wyoming, and the Soda Creek-Fish Creek shear zone, Colorado, *in* Karlstrom, K.E., and Keller, G.R., eds., The Rocky Mountain region—An evolving lithosphere: Tectonics, geochemistry, and geophysics: American Geophysical Union Monograph 154, p. 55–70.
- Krogh, T.E., 1973, A low-contamination method for hydrothermal decomposition of zircon and extraction of U and Pb for isotopic age determinations: *Geochimica et Cosmochimica Acta*, v. 37, p. 485–494.
- Ludwig, K.R., 1988, PBDAT for MS-DOS, a computer program for IBM-PC compatibles for processing raw Pb-U-Th isotope data, version 1.24: U.S. Geological Survey, Open-File Report 88-542, 32 p.
- Ludwig, K.R., 1991, ISOPLOT for MS-DOS, a plotting and regression program for radiogenic-isotope data, for IBM-PC compatible computers, version 2.75 U.S. Geological Survey, Open-File Report 91-445, 45 p.
- Ludwig, K.R., 1998, On the treatment of concordant uranium-lead ages: *Geochimica et Cosmochimica Acta*, v. 62, p. 665–676.
- Ludwig, K.R., 2002, SQUID 1.02, a user's manual: Berkeley Geochronology Center Special Publication 2, 17 p.
- Ludwig, K.R., 2003, ISOPLOT/Ex version 3.0, a geochronological toolkit for Microsoft Excel: Berkeley Geochronology Center Special Publication 4, 71 p.

- Mattinson, J.M., 2005, Zircon U-Pb chemical abrasion ("CA-TIMS") method: Combined annealing and multi-step partial dissolution analysis for improved precision and accuracy of zircon ages: *Chemical Geology*, v. 220, p. 47–66.
- Parrish, R.R., Roddick, J.C., Loveridge, W.D., and Sullivan, R.D., 1987, Uranium-lead analytical techniques at the geochronology laboratory, Geological Survey of Canada, Radiogenic age and isotopic studies, Report 1: Geological Survey of Canada Paper 87-2, p. 3–7.
- Pidgeon, R.T., Nemchin, A.A., and Hitchen, G.J., 1998, Internal structures of zircons from Archaean granites from the Darling Range Batholith; implications for zircon stability and the interpretation of zircon U-Pb ages: *Contributions to Mineralogy and Petrology*, v. 132, p. 288–299.
- Premo, W.R., and Van Schmus, W.R., 1989, Zircon geochronology of Precambrian rocks in southeastern Wyoming and northern Colorado, *in* Grambling, J.A., and Tewksbury, B.J., eds., *Proterozoic Geology of the Southern Rocky Mountains*: Geological Society of America Special Paper 235, p. 13–32.
- Rubatto, D., 2002, Zircon trace element geochemistry; partitioning with garnet and the link between U-Pb ages and metamorphism: *Chemical Geology*, v. 184, p. 123–138.
- Schaltegger, U., Fanning, C.M., Gunther, D., Maurin, J.C., Schulmann, K., and Gebauer, D., 1999, Growth, annealing and recrystallization of zircon and preservation of monazite in high-grade metamorphism: conventional and in-situ U-Pb isotope, cathodoluminescence and microchemical evidence: *Contributions to Mineralogy and Petrology*, v. 134, p. 186–201.
- Scoates, J.S., and Chamberlain, K.R., 1995, Baddeleyite (ZrO<sub>2</sub>) and zircon (ZrSiO<sub>4</sub>) from anorthositic rocks of the Laramie anorthosite complex, Wyoming; petrologic consequences and U-Pb ages: *American Mineralogist*, v. 80, p. 1317–1327.
- Stacey, J.S., and Kramers, J.D., 1975, Approximation of terrestrial lead isotope evolution by a two-stage model: *Earth and Planetary Science Letters*, v. 36, p. 359–362.
- Vavra, G., 1990, On the kinematics of zircon growth and its petrogenetic significance; a cathodoluminescence study: *Contributions to Mineralogy and Petrology*, v. 106, p. 90–99.
- Vavra, G., 1994, Systematics of internal zircon morphology in major Variscan granitoid types: *Contributions to Mineralogy and Petrology*, v. 117, p. 331–344.
- Vavra, G., Gebauer, D., Schmid, R., and Compston, W., 1996, Multiple zircon growth and recrystallization during polyphase Late Carboniferous to Triassic metamorphism in granulites of the Ivrea Zone (Southern Alps); an ion microprobe (SHRIMP) study: *Contributions to Mineralogy and Petrology*, v. 122, p. 337–358.
- Watson, E.B., and Harrison, T.M., 1983, Zircon saturation revisited; temperature and composition effects in a variety of crustal magma types: *Earth and Planetary Science Letters*, v. 64, p. 295–304.
- Williams, I.S., 1998, U-Th-Pb geochronology by ion microprobe, *in* McKibben, M.A., Shanks, W.C., and Ridley, W.I., eds., *Applications of microanalytical techniques to understanding mineralization processes: Reviews in Economic Geology*, v. 7, p. 1–35.

Woensdregt, C.F., 1992, Computation of surface energies in an electrostatic point charge model; 2, Application to zircon ( $\text{ZrSiO}_4$ ): Physics and Chemistry of Minerals, v. 19, p. 59–69.



## Appendix Figures

All ages are SHRIMP  $^{207}\text{Pb}/^{206}\text{Pb}$  spot ages with  $1\sigma$  errors.

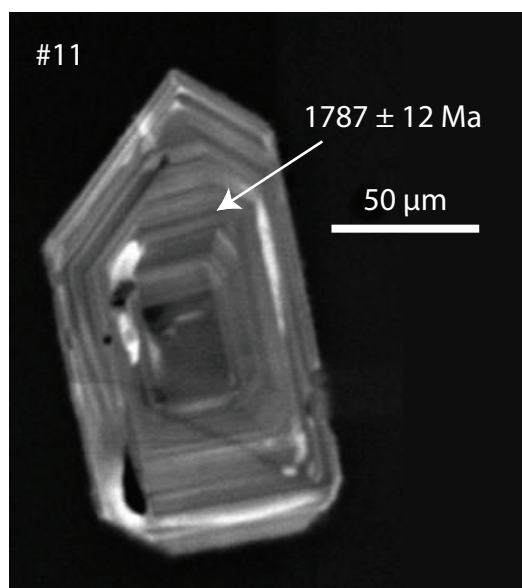

Figure A-1: Euhedral zircon from WRP 82-13. Crystal form and oscillatory zoning are consistent with igneous growth.

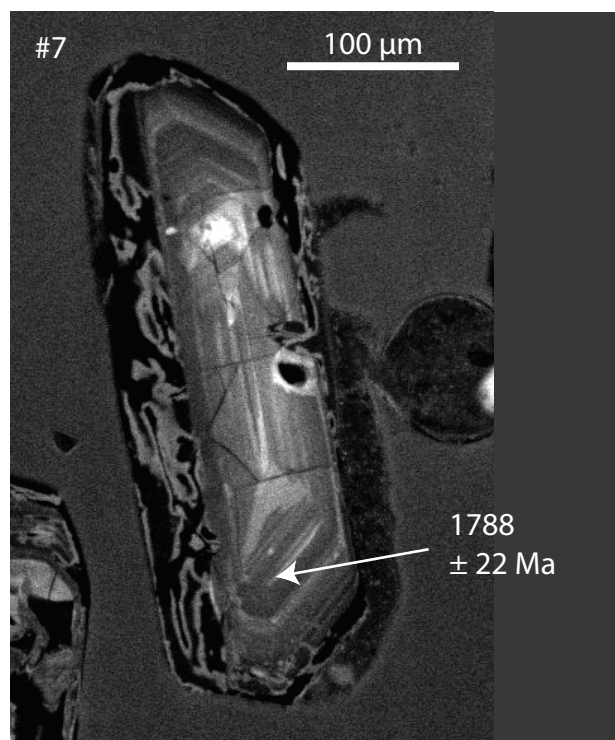

Figure A-2: Zircon from WRP 81-24 with an oscillatory zoned core overgrown by a younger, generally non-luminescent rim with stringy luminescent regions.

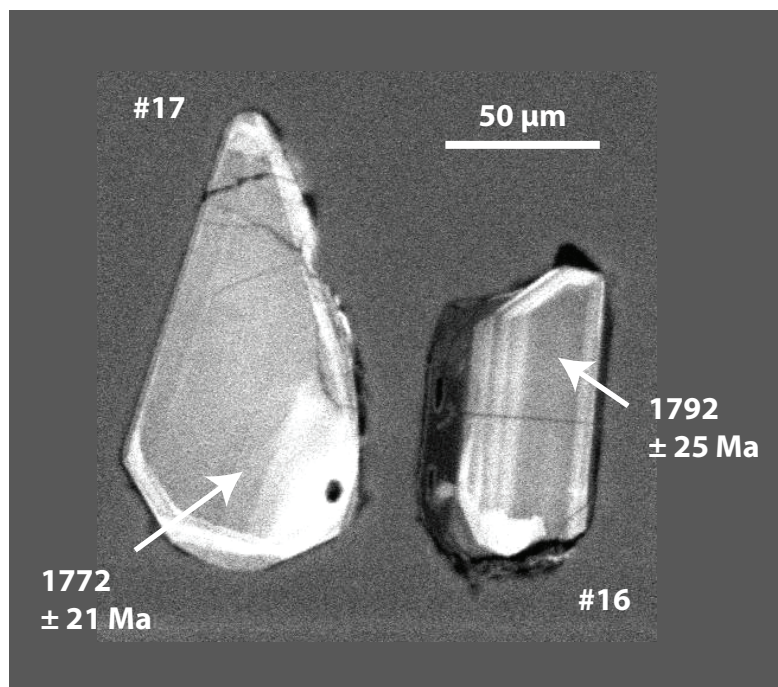

Figure A-3: Zircons from WRP 82-34. #17 shows faint oscillatory zonation and possible thin rims of non-luminescent material. #16 has an oscillatory-zoned core with a distinct younger rim of lower luminescent material similar to WRP 81-24 (Fig. A-2).

## Appendix Figures

All ages are SHRIMP  $^{207}\text{Pb}/^{206}\text{Pb}$  spot ages with  $1\sigma$  errors.

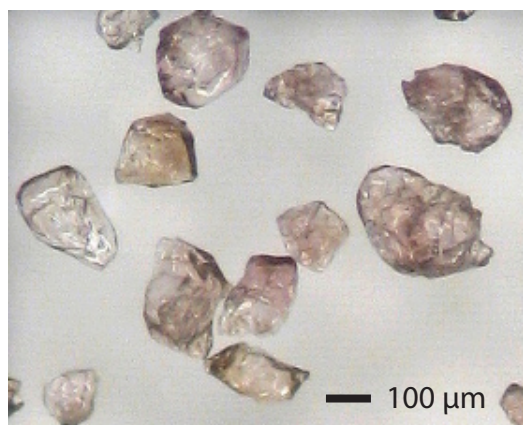

Figure A-4: Anhedral zircons from SM073r. Crystal form is consistent with igneous growth in a mafic rock.

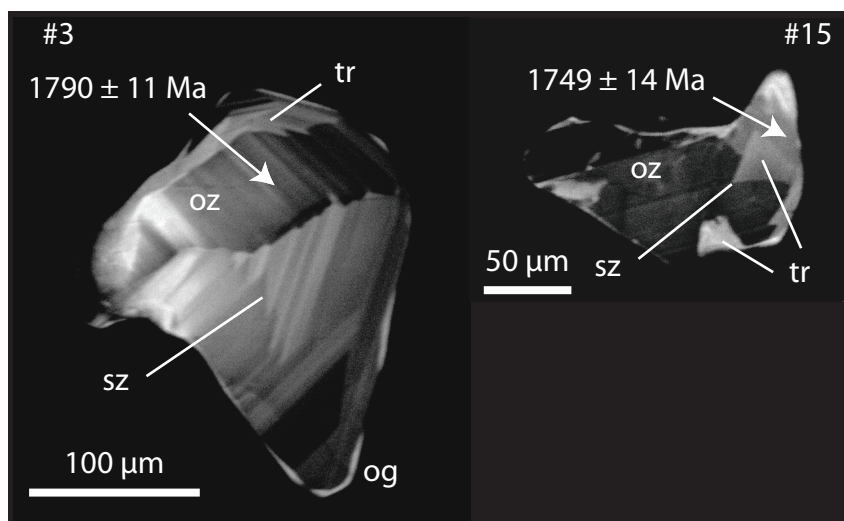

Figure A-5: CL images of SM073r zircons showing primary igneous oscillatory (oz) and sector zoning (sz). They are overprinted by transgressive recrystallization (tr) often bounded by original sector zones (#15), and thin overgrowths (og) representing one or two episodes of metamorphism.

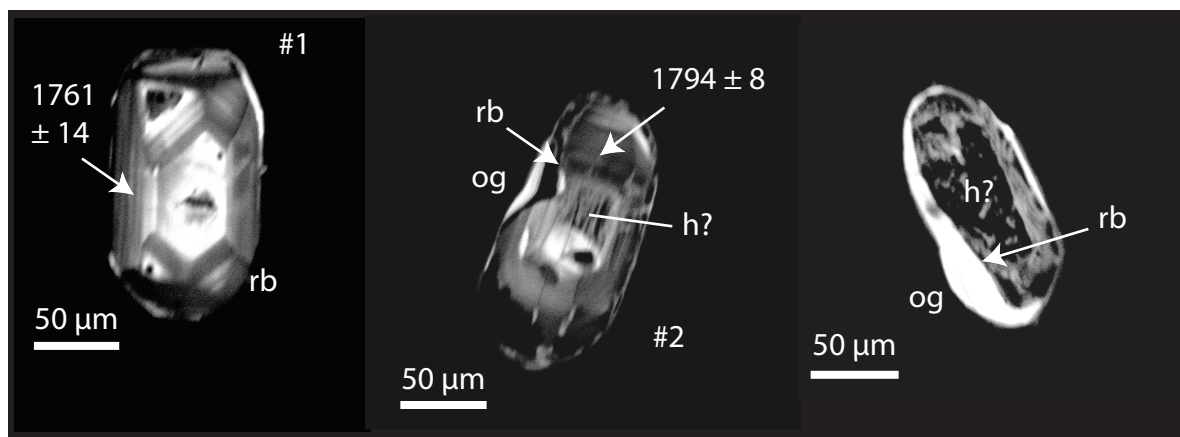

Figure A-6: CL images of SM357 zircons showing primary igneous oscillatory and sector zoning. Following initial growth, the zircons were partially resorbed (rb) and possibly hydrothermally altered (h?) prior to a final stage of strongly luminescent zircon overgrowth (og) interpreted as new metamorphic zircon.



## Appendix Figures

All ages are SHRIMP  $^{207}\text{Pb}/^{206}\text{Pb}$  spot ages with  $1\sigma$  errors.

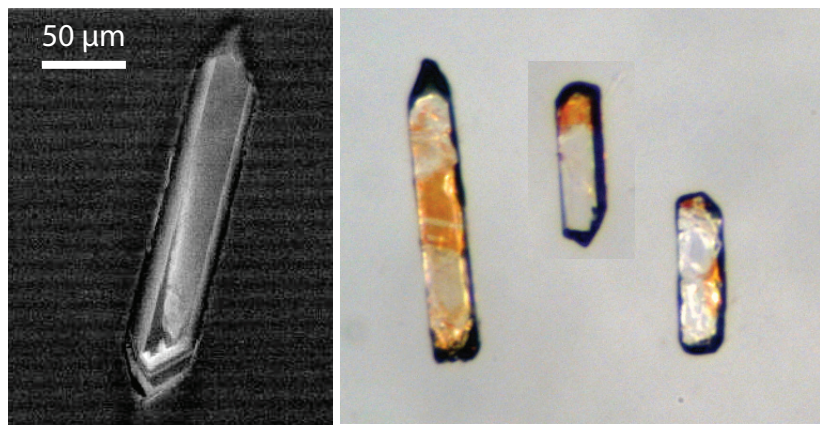

Figure A-7A: CL and transmitted light images of SM009 zircons. Igneous oscillatory zoning is visible along the margins of some grains. There is no visible evidence for overgrowths or resorption.

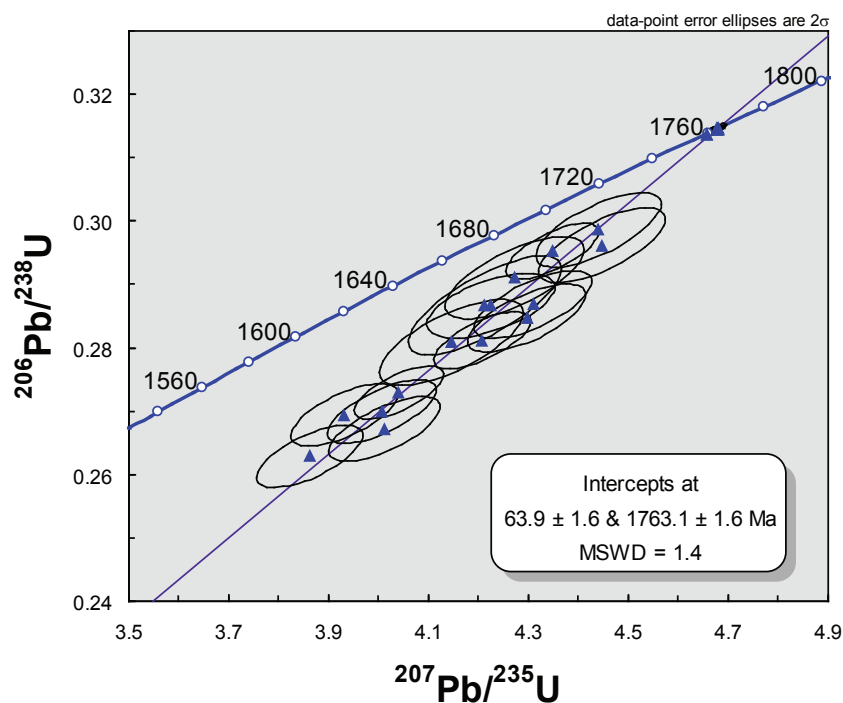

Figure A-7B: Composite concordia diagram showing the concordant CA-ID-TIMS results and the discordant SHRIMP results. Anchoring the discordia at the preferred crystallization age of  $1763.1 \pm 1.6$  Ma results in a lower intercept age of  $\sim 64$  Ma, consistent with Laramide uplift of the Sierra Madre

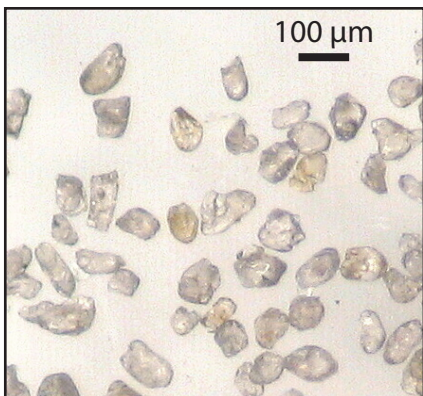

Figure A-8: Subhedral zircons from SM017r. Crystal form suggests that at least some grains grew freely in a melt.

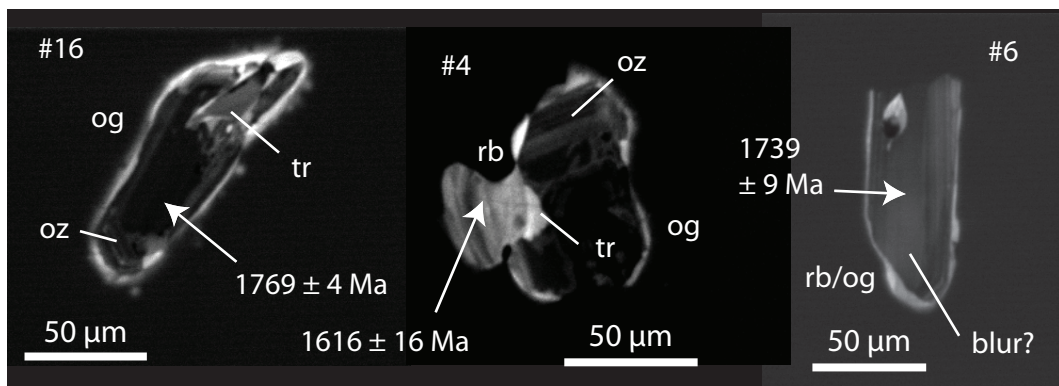

Figure A-9: CL images of SM017r zircons showing faint primary igneous oscillatory zoning (oz). They are overprinted by resorption (rb), transgressive recrystallization (tr), and thin, luminescent overgrowths (og) interpreted as metamorphic. Possible blurring and a small increase in CL intensity may reflect a  $\sim 1.745$  metamorphic event.

## Appendix Figures

All ages are SHRIMP  $^{207}\text{Pb}/^{206}\text{Pb}$  spot ages with  $1\sigma$  errors.

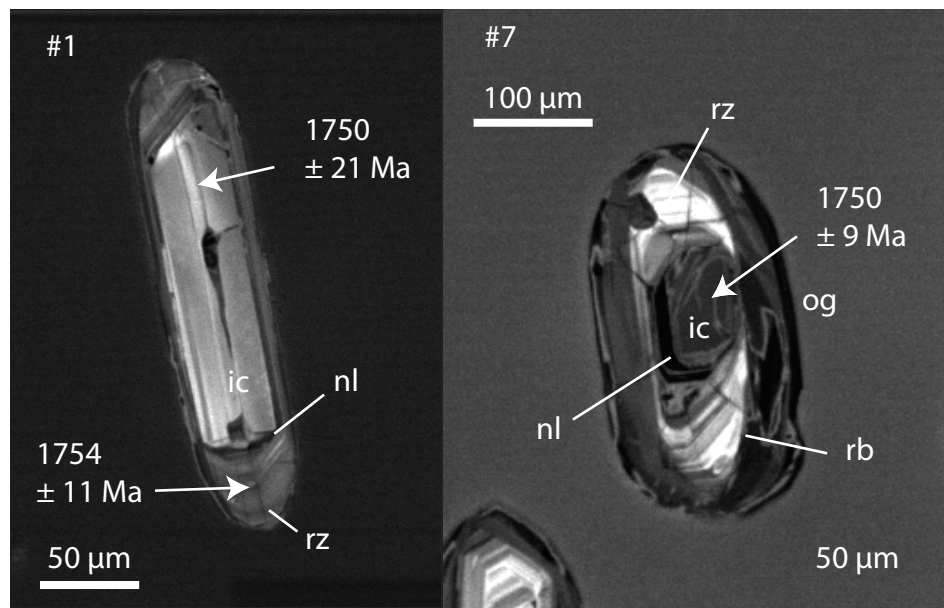

Figure A-10: CL images of SM045 zircons showing a primary igneous core (ic) with faint oscillatory zonation surrounded by a non-luminescent zone (nl) and a rim of modified zircon with relict oscillatory zoning (rz). These regions are overprinted by resorption (rb), which truncates original igneous zoning, followed by a non-luminescent, unzoned overgrowth (og). Grain #7 represents a fairly advanced stage of alteration and is not typical of the grains used to derive the age of the rock.

Figure A-11: BSE (a) and CL (b) images of a SM061r zircon showing faint, primary, igneous oscillatory zoning in both the inner core (ic) and outer core (oc) separated by a nonluminescent zone (nl). The core is overprinted by resorption (rb) which truncates original oscillatory zoning, and surrounded by irregular planar banded overgrowths (og) interpreted as metamorphic. Blurring of zonation in the inner and outer cores and production of the nonluminescent zone is interpreted as metamorphic recrystallization of unknown age. The nonluminescent band in the CL image is dark in the BSE image indicating that it is not composed of crystalline zircon. (The upper dark band in the BSE image is a fracture in the grain.)

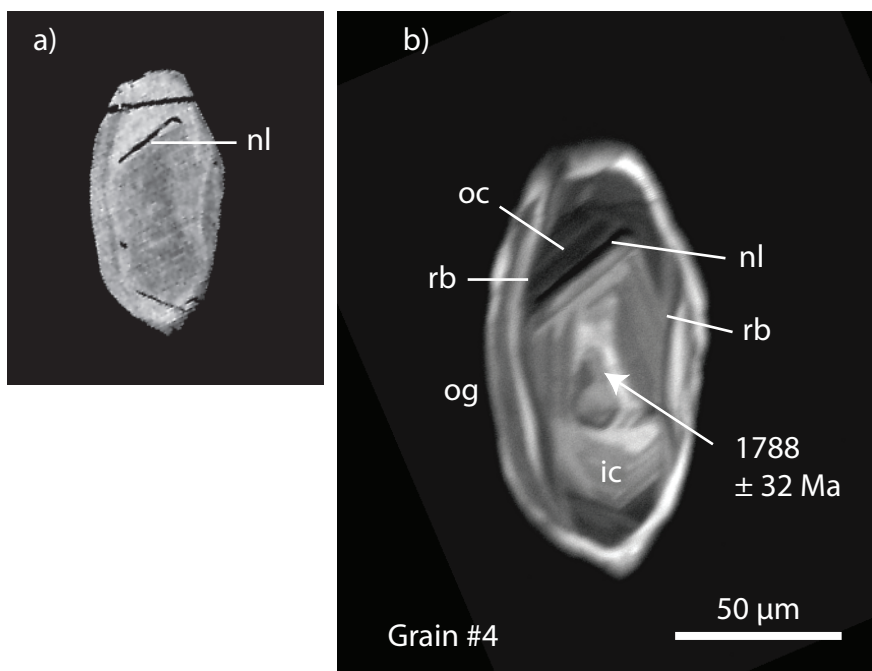



## Appendix Figures

All ages are SHRIMP  $^{207}\text{Pb}/^{206}\text{Pb}$  spot ages with  $1\sigma$  errors.

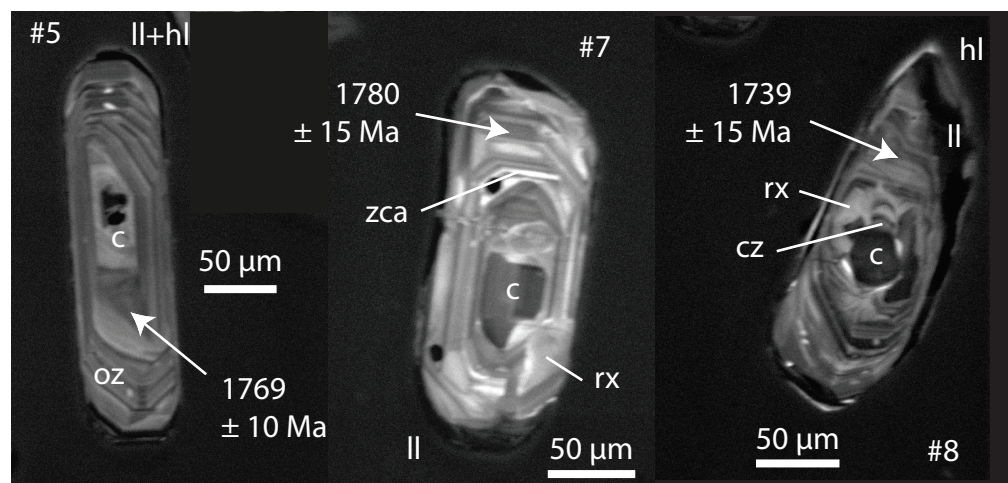

Figure A-12: CL images of SM290 zircons showing possible cores (c) that appear to be preferentially altered and possibly resorbed, overgrown by oscillatory zoned (oz) zircon modified by zone controlled alteration (zca; Vavra et al., 1996), convoluted zoning (cz), and recrystallization (rx). The progression from unaltered (#5) to predominantly zone altered (#7) to convoluted zoning (#8) may reflect a genetic sequence of increasing alteration. They are variably overprinted by resorption (rb), low-luminescence overgrowths (ll) and thin, outer, high luminescence overgrowths (hl) interpreted as metamorphic.

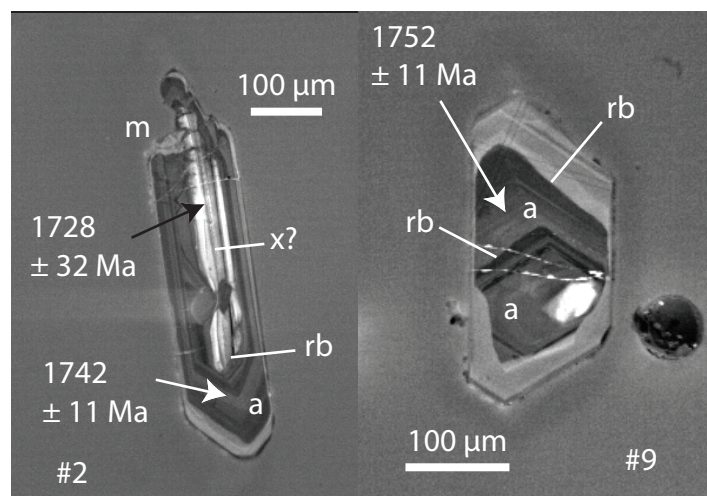

Figure A-13: CL images of SM058 zircons showing primary igneous oscillatory zoning in both the possibly xenocrystic cores (x?) and anatectic overgrowths (a). Resorption features (rb) are common both at the margin between cores and overgrowths (#2) as well as internal to the overgrowths (#9). Resorption surfaces within the overgrowths are interpreted as episodic zircon undersaturation during anatexis. Agreement between the spot ages of the xenocrystic core and anatectic overgrowth suggest that the age of the core was reset during anatexis. Late metamorphic recrystallization (m) is seen on #2. Polishing was not deep enough on #9 to expose any cores which may be present.

Table A-1. U-Th-Pb analytical data for SHRIMP spot analyses

| Grains/<br>Spots                                                                                                                                    | Interp | U (ppm) | Th (ppm) | Th/U | % comm<br><sup>206</sup> Pb | <sup>206</sup> Pb/<br><sup>238</sup> U <sup>#</sup> | ± <sup>206</sup> Pb/<br><sup>238</sup> U <sup>\$</sup> | <sup>207</sup> Pb/<br><sup>235</sup> U <sup>#</sup> | ± <sup>207</sup> Pb/<br><sup>235</sup> U <sup>\$</sup> | <sup>207</sup> Pb/<br><sup>206</sup> Pb <sup>#</sup> | ± <sup>207</sup> Pb/<br><sup>206</sup> Pb <sup>\$</sup> | <sup>207</sup> Pb/<br>Age Ma | ± <sup>207</sup> Pb/<br>Age Ma <sup>\$</sup> | %<br>Discord <sup>†</sup> |
|-----------------------------------------------------------------------------------------------------------------------------------------------------|--------|---------|----------|------|-----------------------------|-----------------------------------------------------|--------------------------------------------------------|-----------------------------------------------------|--------------------------------------------------------|------------------------------------------------------|---------------------------------------------------------|------------------------------|----------------------------------------------|---------------------------|
| <b>WRP 82-13 (dacitic metavolcanic rock; igneous age 1781 +/- 8 Ma (MSWD 0.43); UTM NAD27 13 T 0341527; 4553772)</b>                                |        |         |          |      |                             |                                                     |                                                        |                                                     |                                                        |                                                      |                                                         |                              |                                              |                           |
| 1.1                                                                                                                                                 | ig     | 242     | 55       | 0.23 | 0.03                        | 0.3101                                              | 0.7                                                    | 4.62                                                | 1.0                                                    | 0.1081                                               | 0.7                                                     | 1768                         | 13                                           | 2                         |
| 2.1                                                                                                                                                 | ig     | 214     | 46       | 0.21 | 0.12                        | 0.3137                                              | 0.8                                                    | 4.68                                                | 1.2                                                    | 0.1082                                               | 0.9                                                     | 1770                         | 16                                           | 1                         |
| 3.1                                                                                                                                                 | ig     | 338     | 115      | 0.34 | 0.88                        | 0.3034                                              | 0.6                                                    | 4.58                                                | 1.3                                                    | 0.1095                                               | 1.1                                                     | 1791                         | 21                                           | 5                         |
| 4.1                                                                                                                                                 | ig     | 324     | 88       | 0.27 | 1.09                        | 0.2964                                              | 0.7                                                    | 4.61                                                | 1.5                                                    | 0.1128                                               | 1.3                                                     | 1846                         | 24                                           | 10                        |
| 5.1                                                                                                                                                 | ig     | 343     | 99       | 0.29 | 0.02                        | 0.3028                                              | 0.6                                                    | 4.57                                                | 0.9                                                    | 0.1095                                               | 0.6                                                     | 1792                         | 12                                           | 5                         |
| 6.1                                                                                                                                                 | ig     | 310     | 81       | 0.26 | 0.10                        | 0.3116                                              | 0.7                                                    | 4.68                                                | 1.1                                                    | 0.1090                                               | 0.9                                                     | 1783                         | 16                                           | 2                         |
| 6.2                                                                                                                                                 | ig     | 501     | 231      | 0.46 | 14.09                       | 0.2292                                              | 1.0                                                    | 3.82                                                | 7.0                                                    | 0.1207                                               | 6.9                                                     | 1967                         | 123                                          | 48                        |
| 7.1                                                                                                                                                 | ig     | 348     | 107      | 0.31 | 0.13                        | 0.2931                                              | 0.7                                                    | 4.40                                                | 1.0                                                    | 0.1090                                               | 0.8                                                     | 1782                         | 14                                           | 8                         |
| 8.1                                                                                                                                                 | ig     | 264     | 62       | 0.23 | 0.07                        | 0.3013                                              | 0.7                                                    | 4.49                                                | 1.1                                                    | 0.1081                                               | 0.8                                                     | 1768                         | 15                                           | 4                         |
| 9.1                                                                                                                                                 | ig     | 358     | 114      | 0.32 | 0.03                        | 0.3072                                              | 0.6                                                    | 4.60                                                | 0.9                                                    | 0.1085                                               | 0.7                                                     | 1775                         | 12                                           | 3                         |
| 10.1                                                                                                                                                | ig     | 368     | 114      | 0.31 | 0.45                        | 0.2968                                              | 0.6                                                    | 4.42                                                | 1.2                                                    | 0.1080                                               | 1.0                                                     | 1766                         | 19                                           | 5                         |
| 11.1                                                                                                                                                | ig     | 331     | 90       | 0.27 | 0.03                        | 0.3122                                              | 0.6                                                    | 4.70                                                | 0.9                                                    | 0.1093                                               | 0.7                                                     | 1787                         | 12                                           | 2                         |
| 12.1                                                                                                                                                | ig     | 272     | 72       | 0.26 | 0.04                        | 0.3050                                              | 0.7                                                    | 4.57                                                | 1.0                                                    | 0.1087                                               | 0.7                                                     | 1778                         | 13                                           | 4                         |
| <b>SM073r (metagabbro; igneous age 1782 +/- 7 Ma (MSWD 0.92), minimum metamorphic age 1743 +/- 14 Ma (MSWD 0.52); UTM NAD27 13T 358479 4541169)</b> |        |         |          |      |                             |                                                     |                                                        |                                                     |                                                        |                                                      |                                                         |                              |                                              |                           |
| 1                                                                                                                                                   | ig     | 129     | 25       | 0.19 | 0.00                        | 0.3061                                              | 0.9                                                    | 4.59                                                | 1.3                                                    | 0.1088                                               | 0.9                                                     | 1780                         | 17                                           | 3                         |
| 2                                                                                                                                                   | ig     | 239     | 54       | 0.22 | 0.03                        | 0.3103                                              | 0.7                                                    | 4.62                                                | 1.0                                                    | 0.1079                                               | 0.7                                                     | 1765                         | 13                                           | 1                         |
| 3                                                                                                                                                   | ig     | 308     | 100      | 0.33 | 0.00                        | 0.3146                                              | 0.6                                                    | 4.75                                                | 0.9                                                    | 0.1094                                               | 0.6                                                     | 1790                         | 11                                           | 2                         |
| 4                                                                                                                                                   | bad    | 107     | 22       | 0.20 | 0.12                        | 0.3212                                              | 1.1                                                    | 4.73                                                | 1.6                                                    | 0.1068                                               | 1.2                                                     | 1745                         | 21                                           | -3                        |
| 5                                                                                                                                                   | ig     | 272     | 72       | 0.26 | 0.05                        | 0.3056                                              | 0.7                                                    | 4.55                                                | 1.1                                                    | 0.1080                                               | 0.8                                                     | 1766                         | 15                                           | 3                         |
| 6                                                                                                                                                   | ig     | 529     | 120      | 0.23 | 0.01                        | 0.3045                                              | 0.4                                                    | 4.60                                                | 0.6                                                    | 0.1096                                               | 0.5                                                     | 1792                         | 8                                            | 5                         |
| 7                                                                                                                                                   | ig     | 441     | 143      | 0.32 | 0.00                        | 0.3107                                              | 0.5                                                    | 4.69                                                | 0.7                                                    | 0.1096                                               | 0.5                                                     | 1793                         | 9                                            | 3                         |
| 8                                                                                                                                                   | bad    | 240     | 64       | 0.27 | 0.37                        | 0.3064                                              | 0.8                                                    | 4.39                                                | 2.9                                                    | 0.1038                                               | 2.8                                                     | 1694                         | 52                                           | -2                        |
| 9                                                                                                                                                   | ig     | 169     | 35       | 0.20 | 0.04                        | 0.3169                                              | 0.8                                                    | 4.73                                                | 1.2                                                    | 0.1082                                               | 0.8                                                     | 1769                         | 15                                           | 0                         |
| 10                                                                                                                                                  | ig     | 302     | 99       | 0.33 | 0.00                        | 0.3102                                              | 0.6                                                    | 4.65                                                | 0.9                                                    | 0.1087                                               | 0.6                                                     | 1778                         | 11                                           | 2                         |
| 11                                                                                                                                                  | ig     | 347     | 79       | 0.23 | 0.01                        | 0.3142                                              | 0.6                                                    | 4.70                                                | 0.8                                                    | 0.1084                                               | 0.6                                                     | 1773                         | 10                                           | 1                         |
| 12                                                                                                                                                  | ig     | 414     | 141      | 0.34 | 0.01                        | 0.3142                                              | 0.5                                                    | 4.73                                                | 0.7                                                    | 0.1092                                               | 0.5                                                     | 1787                         | 9                                            | 1                         |
| 13                                                                                                                                                  | rxtl   | 340     | 107      | 0.32 | 0.02                        | 0.3058                                              | 0.6                                                    | 4.48                                                | 0.8                                                    | 0.1062                                               | 0.6                                                     | 1735                         | 11                                           | 1                         |
| 14                                                                                                                                                  | rxtl   | 267     | 55       | 0.21 | 0.06                        | 0.3135                                              | 0.7                                                    | 4.63                                                | 1.0                                                    | 0.1071                                               | 0.7                                                     | 1751                         | 13                                           | 0                         |
| 15                                                                                                                                                  | rxtl   | 193     | 49       | 0.25 | 0.04                        | 0.3104                                              | 0.8                                                    | 4.58                                                | 1.1                                                    | 0.1070                                               | 0.8                                                     | 1749                         | 14                                           | 0                         |
| <b>SM357 (biotite granodiorite; igneous age 1777 +/- 11 Ma (MSWD 0.97); UTM NAD27 13 T 360740 4542708)</b>                                          |        |         |          |      |                             |                                                     |                                                        |                                                     |                                                        |                                                      |                                                         |                              |                                              |                           |
| 1                                                                                                                                                   | ig     | 280     | 54       | 0.19 | 0.19                        | 0.3188                                              | 0.6                                                    | 4.74                                                | 1.0                                                    | 0.1077                                               | 0.8                                                     | 1761                         | 14                                           | -1                        |
| 2                                                                                                                                                   | ?      | 546     | 280      | 0.51 | 0.03                        | 0.3054                                              | 0.4                                                    | 4.62                                                | 0.6                                                    | 0.1097                                               | 0.5                                                     | 1794                         | 8                                            | 4                         |
| 3                                                                                                                                                   | ig     | 736     | 239      | 0.32 | 0.02                        | 0.3111                                              | 0.4                                                    | 4.63                                                | 0.6                                                    | 0.1079                                               | 0.4                                                     | 1765                         | 8                                            | 1                         |
| 4                                                                                                                                                   | ig     | 474     | 85       | 0.18 | -0.02                       | 0.3179                                              | 0.5                                                    | 4.74                                                | 0.7                                                    | 0.1082                                               | 0.5                                                     | 1769                         | 9                                            | -1                        |
| 5                                                                                                                                                   | ig     | 627     | 188      | 0.30 | 0.02                        | 0.3196                                              | 0.4                                                    | 4.77                                                | 0.6                                                    | 0.1084                                               | 0.4                                                     | 1772                         | 8                                            | -1                        |
| 6                                                                                                                                                   | bad    | 306     | 103      | 0.34 | 0.86                        | 0.2620                                              | 0.7                                                    | 3.61                                                | 1.6                                                    | 0.0999                                               | 1.4                                                     | 1621                         | 26                                           | 8                         |
| 7                                                                                                                                                   | ig     | 395     | 105      | 0.27 | 0.03                        | 0.3194                                              | 0.6                                                    | 4.80                                                | 0.8                                                    | 0.1091                                               | 0.6                                                     | 1784                         | 10                                           | 0                         |
| 8                                                                                                                                                   | ig     | 296     | 101      | 0.34 | 0.03                        | 0.3130                                              | 0.6                                                    | 4.64                                                | 0.9                                                    | 0.1075                                               | 0.7                                                     | 1758                         | 12                                           | 0                         |

|    |     |     |     |      |      |        |     |      |     |        |     |      |    |   |
|----|-----|-----|-----|------|------|--------|-----|------|-----|--------|-----|------|----|---|
| 9  | ig  | 464 | 317 | 0.68 | 0.16 | 0.3012 | 0.5 | 4.44 | 1.1 | 0.1070 | 1.0 | 1750 | 18 | 3 |
| 10 | ig  | 279 | 63  | 0.23 | 0.00 | 0.3152 | 0.7 | 4.74 | 0.9 | 0.1090 | 0.6 | 1783 | 12 | 1 |
| 11 | ig  | 540 | 246 | 0.45 | 0.03 | 0.3143 | 0.5 | 4.72 | 0.7 | 0.1090 | 0.5 | 1782 | 9  | 1 |
| 12 | ig  | 378 | 142 | 0.38 | 0.15 | 0.3075 | 0.6 | 4.55 | 0.9 | 0.1072 | 0.7 | 1753 | 12 | 1 |
| 13 | ig  | 534 | 164 | 0.31 | 0.05 | 0.3205 | 0.5 | 4.86 | 0.7 | 0.1099 | 0.5 | 1797 | 10 | 0 |
| 14 | bad | 245 | 252 | 1.03 | 0.91 | 0.3156 | 0.7 | 4.74 | 1.9 | 0.1091 | 1.8 | 1784 | 32 | 1 |

**SM009 (garnet-bearing metagabbro; UTM NAD27 13 T 359189 4546742)**

|    |    |     |     |      |      |        |     |      |     |        |     |      |    |    |
|----|----|-----|-----|------|------|--------|-----|------|-----|--------|-----|------|----|----|
| 1  | ig | 158 | 51  | 0.32 | 0.02 | 0.2699 | 0.8 | 4.01 | 1.1 | 0.1076 | 0.8 | 1760 | 15 | 14 |
| 2  | ig | 168 | 58  | 0.35 | 0.04 | 0.2694 | 0.7 | 3.93 | 1.1 | 0.1059 | 0.8 | 1729 | 15 | 12 |
| 3  | ig | 228 | 78  | 0.34 | 0.00 | 0.2729 | 0.6 | 4.04 | 0.9 | 0.1074 | 0.7 | 1755 | 12 | 13 |
| 4  | ig | 166 | 56  | 0.34 | 0.17 | 0.2866 | 0.7 | 4.22 | 1.2 | 0.1069 | 1.0 | 1747 | 18 | 8  |
| 5  | ig | 90  | 24  | 0.26 | 0.00 | 0.2808 | 1.0 | 4.15 | 1.4 | 0.1071 | 1.0 | 1750 | 19 | 10 |
| 6  | ig | 95  | 31  | 0.33 | 0.00 | 0.2867 | 1.1 | 4.21 | 1.5 | 0.1066 | 1.0 | 1742 | 18 | 7  |
| 7  | ig | 250 | 115 | 0.46 | 0.01 | 0.2952 | 0.6 | 4.35 | 0.9 | 0.1068 | 0.6 | 1746 | 11 | 5  |
| 8  | ig | 151 | 50  | 0.33 | 0.04 | 0.2847 | 0.8 | 4.30 | 1.1 | 0.1095 | 0.8 | 1791 | 15 | 11 |
| 9  | ig | 104 | 36  | 0.35 | 0.00 | 0.2910 | 0.9 | 4.27 | 1.3 | 0.1064 | 1.0 | 1739 | 18 | 6  |
| 10 | ig | 209 | 76  | 0.36 | 0.02 | 0.2812 | 0.7 | 4.21 | 0.9 | 0.1085 | 0.7 | 1775 | 13 | 11 |
| 11 | ig | 128 | 44  | 0.34 | 0.00 | 0.2962 | 0.8 | 4.45 | 1.2 | 0.1089 | 0.8 | 1781 | 15 | 7  |
| 12 | ig | 154 | 54  | 0.35 | 0.02 | 0.2868 | 0.8 | 4.31 | 1.1 | 0.1090 | 0.8 | 1782 | 15 | 10 |
| 13 | ig | 136 | 51  | 0.37 | 0.00 | 0.2986 | 0.8 | 4.44 | 1.2 | 0.1078 | 0.8 | 1763 | 15 | 5  |
| 14 | ig | 161 | 55  | 0.34 | 0.03 | 0.2629 | 0.8 | 3.86 | 1.1 | 0.1066 | 0.8 | 1741 | 15 | 16 |
| 15 | ig | 148 | 50  | 0.34 | 0.00 | 0.2672 | 0.8 | 4.01 | 1.1 | 0.1089 | 0.8 | 1781 | 15 | 17 |

**SM017r (garnet-bearing metagabbro; igneous age ~1763 Ma; UTM NAD27 13 T 359189 4546742)**

|    |       |      |      |      |       |        |     |      |     |        |     |      |    |     |
|----|-------|------|------|------|-------|--------|-----|------|-----|--------|-----|------|----|-----|
| 1  | ig    | 873  | 510  | 0.58 | 0.00  | 0.2760 | 0.3 | 4.12 | 0.5 | 0.1084 | 0.3 | 1773 | 6  | 13  |
| 2  | ig    | 937  | 534  | 0.57 | 0.03  | 0.2472 | 0.4 | 3.60 | 0.5 | 0.1058 | 0.4 | 1727 | 6  | 21  |
| 3  | mix?  | 1209 | 1363 | 1.13 | 0.00  | 0.2825 | 0.3 | 4.18 | 0.4 | 0.1074 | 0.3 | 1755 | 5  | 9   |
| 4  | rim   | 201  | 57   | 0.28 | 0.08  | 0.2570 | 0.7 | 3.53 | 1.1 | 0.0995 | 0.9 | 1616 | 16 | 10  |
| 5  | bad   | 121  | 25   | 0.21 | 4.36  | 0.2700 | 0.9 | 3.59 | 3.6 | 0.0965 | 3.5 | 1558 | 66 | 1   |
| 6  | ig    | 483  | 298  | 0.62 | 0.02  | 0.2762 | 0.4 | 4.05 | 0.6 | 0.1064 | 0.5 | 1739 | 9  | 11  |
| 7  | rxtl? | 96   | 24   | 0.25 | 0.44  | 0.2598 | 1.0 | 3.71 | 1.9 | 0.1035 | 1.7 | 1688 | 31 | 13  |
| 8  | bad   | 2052 | 3157 | 1.54 | 0.01  | 0.1241 | 0.3 | 1.63 | 0.4 | 0.0950 | 0.3 | 1528 | 6  | 103 |
| 9  | bad   | 105  | 23   | 0.22 | 2.94  | 0.2780 | 1.0 | 3.86 | 5.1 | 0.1006 | 5.0 | 1635 | 92 | 3   |
| 10 | ig    | 548  | 411  | 0.75 | 0.89  | 0.2887 | 0.4 | 4.29 | 0.9 | 0.1077 | 0.8 | 1761 | 15 | 8   |
| 11 | ig    | 776  | 606  | 0.78 | 0.00  | 0.2862 | 0.3 | 4.21 | 0.5 | 0.1068 | 0.4 | 1745 | 7  | 8   |
| 12 | ig    | 722  | 430  | 0.60 | 0.01  | 0.2873 | 0.4 | 4.15 | 0.5 | 0.1047 | 0.4 | 1708 | 7  | 5   |
| 13 | rim?  | 95   | 20   | 0.21 | 0.20  | 0.2807 | 1.0 | 3.79 | 1.6 | 0.0980 | 1.3 | 1587 | 24 | -1  |
| 14 | rxtl? | 97   | 22   | 0.23 | 0.09  | 0.2918 | 1.0 | 4.23 | 1.4 | 0.1051 | 1.1 | 1715 | 20 | 4   |
| 15 | ig    | 1028 | 846  | 0.82 | 0.00  | 0.2971 | 0.3 | 4.41 | 0.4 | 0.1077 | 0.3 | 1761 | 6  | 5   |
| 16 | ig    | 1822 | 1242 | 0.68 | 0.01  | 0.2863 | 0.2 | 4.27 | 0.3 | 0.1082 | 0.2 | 1769 | 4  | 9   |
| 17 | mix   | 175  | 110  | 0.63 | 0.06  | 0.2760 | 0.7 | 3.90 | 1.0 | 0.1024 | 0.8 | 1669 | 14 | 6   |
| 18 | rim   | 137  | 34   | 0.25 | 0.15  | 0.2739 | 0.9 | 3.79 | 1.4 | 0.1003 | 1.1 | 1630 | 20 | 4   |
| 19 | ig    | 871  | 715  | 0.82 | 0.00  | 0.2720 | 0.3 | 4.09 | 0.5 | 0.1089 | 0.3 | 1782 | 6  | 15  |
| 20 | ig    | 315  | 224  | 0.71 | -0.03 | 0.2641 | 0.5 | 3.89 | 0.8 | 0.1067 | 0.6 | 1745 | 10 | 15  |

**WRP 81-24 (Sierra Madre Granite; igneous age 1763 +/- 9 Ma (MSWD 0.53); UTM NAD27 13 T 343576 4544129)**

|    |     |     |     |      |       |        |      |      |       |        |      |      |     |    |
|----|-----|-----|-----|------|-------|--------|------|------|-------|--------|------|------|-----|----|
| 1  | ig  | 73  | 18  | 0.24 | 0.15  | 0.3092 | 1.42 | 4.59 | 1.85  | 0.1076 | 1.2  | 1759 | 22  | 1  |
| 2  | ig  | 580 | 102 | 0.18 | 0.21  | 0.3068 | 1.04 | 4.56 | 1.15  | 0.1077 | 0.5  | 1762 | 9   | 2  |
| 3  | ig  | 113 | 34  | 0.30 | 0.24  | 0.3091 | 1.28 | 4.60 | 1.68  | 0.1080 | 1.1  | 1767 | 20  | 2  |
| 4  | ig  | 394 | 71  | 0.18 | 8.84  | 0.2381 | 1.12 | 3.51 | 3.22  | 0.1071 | 3.0  | 1749 | 55  | 27 |
| 5  | ig  | 256 | 22  | 0.09 | 0.96  | 0.1921 | 1.15 | 2.85 | 1.79  | 0.1077 | 1.4  | 1761 | 25  | 55 |
| 6  | ig  | 117 | 35  | 0.30 | 0.31  | 0.3092 | 1.31 | 4.59 | 2.02  | 0.1077 | 1.5  | 1760 | 28  | 1  |
| 7  | ig  | 338 | 57  | 0.17 | 1.04  | 0.2182 | 1.09 | 3.29 | 1.64  | 0.1094 | 1.2  | 1788 | 22  | 41 |
| 8  | ig  | 610 | 83  | 0.14 | 0.69  | 0.2905 | 1.05 | 4.28 | 1.48  | 0.1070 | 1.0  | 1748 | 19  | 6  |
| 9  | ig  | 140 | 38  | 0.27 | 0.32  | 0.2851 | 1.25 | 4.20 | 1.69  | 0.1070 | 1.1  | 1749 | 21  | 8  |
| 10 | ig  | 256 | 54  | 0.21 | 3.33  | 0.3040 | 1.19 | 4.53 | 3.54  | 0.1082 | 3.3  | 1769 | 61  | 3  |
| 11 | ig  | 115 | 27  | 0.23 | 0.39  | 0.2885 | 1.28 | 4.29 | 1.82  | 0.1079 | 1.3  | 1764 | 24  | 8  |
| 12 | bad | 746 | 174 | 0.23 | 22.21 | 0.1473 | 1.73 | 2.10 | 14.33 | 0.1036 | 14.2 | 1688 | 262 | 91 |
| 13 | ig  | 164 | 43  | 0.26 | 0.20  | 0.3022 | 1.26 | 4.44 | 1.69  | 0.1065 | 1.1  | 1740 | 20  | 2  |
| 14 | ig  | 102 | 22  | 0.22 | 0.08  | 0.3199 | 1.32 | 4.68 | 1.85  | 0.1061 | 1.3  | 1733 | 24  | -3 |
| 15 | ig  | 428 | 69  | 0.16 | 0.65  | 0.2591 | 1.07 | 3.88 | 1.60  | 0.1085 | 1.2  | 1775 | 22  | 20 |
| 16 | ig  | 445 | 83  | 0.19 | 0.16  | 0.3018 | 1.06 | 4.47 | 1.26  | 0.1075 | 0.7  | 1758 | 12  | 3  |
| 17 | ig  | 133 | 36  | 0.27 | 0.42  | 0.2723 | 1.34 | 4.13 | 1.85  | 0.1100 | 1.3  | 1800 | 23  | 16 |
| 18 | ig  | 182 | 39  | 0.22 | 0.88  | 0.2988 | 1.23 | 4.42 | 2.26  | 0.1074 | 1.9  | 1756 | 35  | 4  |
| 19 | ig  | 368 | 72  | 0.19 | 0.65  | 0.3020 | 1.09 | 4.53 | 1.62  | 0.1089 | 1.2  | 1781 | 22  | 5  |
| 20 | ig  | 273 | 55  | 0.20 | 0.04  | 0.3188 | 1.12 | 4.76 | 1.28  | 0.1082 | 0.6  | 1770 | 11  | -1 |

**WRP 82-34 (Sierra Madre Granite; igneous age 1766 +/- 8 Ma (MSWD 1.3); UTM NAD27 13 T 338617 4544885)**

|    |     |     |    |      |       |        |      |      |      |        |     |      |    |     |
|----|-----|-----|----|------|-------|--------|------|------|------|--------|-----|------|----|-----|
| 1  | ig  | 155 | 39 | 0.25 | 0.11  | 0.3087 | 1.15 | 4.62 | 1.38 | 0.1086 | 0.8 | 1775 | 14 | 2   |
| 2  | ig  | 171 | 51 | 0.30 | 0.06  | 0.3069 | 1.14 | 4.62 | 1.38 | 0.1093 | 0.8 | 1787 | 14 | 4   |
| 3  | ig  | 170 | 57 | 0.34 | 0.01  | 0.2809 | 1.23 | 4.23 | 1.45 | 0.1092 | 0.8 | 1787 | 14 | 12  |
| 4  | ig  | 373 | 82 | 0.22 | 0.21  | 0.3017 | 1.04 | 4.44 | 1.20 | 0.1069 | 0.6 | 1747 | 11 | 3   |
| 5  | ig  | 107 | 26 | 0.24 | 0.14  | 0.3199 | 1.27 | 4.65 | 1.65 | 0.1054 | 1.1 | 1721 | 19 | -4  |
| 6  | ig  | 70  | 19 | 0.28 | 0.17  | 0.3061 | 1.47 | 4.50 | 2.02 | 0.1066 | 1.4 | 1742 | 26 | 1   |
| 7  | bad | 90  | 10 | 0.12 | 1.02  | 0.0718 | 1.54 | 1.03 | 3.50 | 0.1043 | 3.1 | 1701 | 58 | 281 |
| 8  | bad | 307 | 74 | 0.24 | 1.97  | 0.1872 | 1.26 | 2.52 | 5.06 | 0.0977 | 4.9 | 1582 | 92 | 43  |
| 9  | ig  | 119 | 38 | 0.32 | 0.00  | 0.3117 | 1.29 | 4.65 | 1.61 | 0.1083 | 1.0 | 1771 | 18 | 1   |
| 10 | bad | 252 | 50 | 0.20 | 1.80  | 0.1958 | 1.15 | 2.86 | 2.40 | 0.1060 | 2.1 | 1732 | 39 | 50  |
| 11 | ig  | 82  | 17 | 0.21 | 0.00  | 0.3026 | 1.43 | 4.51 | 1.85 | 0.1080 | 1.2 | 1766 | 22 | 4   |
| 12 | ig  | 94  | 22 | 0.24 | 0.08  | 0.3112 | 1.34 | 4.61 | 1.77 | 0.1073 | 1.2 | 1755 | 21 | 0   |
| 13 | ig  | 231 | 51 | 0.22 | -0.03 | 0.3090 | 1.11 | 4.62 | 1.28 | 0.1085 | 0.6 | 1774 | 12 | 2   |
| 14 | ig  | 184 | 49 | 0.27 | 0.09  | 0.3085 | 1.15 | 4.57 | 1.39 | 0.1075 | 0.8 | 1758 | 14 | 1   |
| 15 | ig  | 165 | 38 | 0.23 | 0.12  | 0.3120 | 1.17 | 4.68 | 1.44 | 0.1089 | 0.8 | 1781 | 15 | 2   |
| 16 | ig  | 74  | 22 | 0.29 | 0.20  | 0.3056 | 1.45 | 4.62 | 2.00 | 0.1096 | 1.4 | 1792 | 25 | 4   |
| 17 | ig  | 96  | 28 | 0.29 | 0.11  | 0.2967 | 1.36 | 4.43 | 1.78 | 0.1084 | 1.1 | 1772 | 21 | 6   |

**SM045 (Migmatitic augen gneiss; igneous age 1769 +/- 10 Ma (MSWD 0.61); metamorphic ages 1752 +/- 13, 1618 +/- 9 Ma; UTM NAD27 13 T 351034 4545207)**

|     |    |     |     |      |      |        |     |      |     |        |     |      |    |    |
|-----|----|-----|-----|------|------|--------|-----|------|-----|--------|-----|------|----|----|
| 1.1 | ig | 143 | 47  | 0.33 | 0.25 | 0.2929 | 0.8 | 4.32 | 1.4 | 0.1071 | 1.2 | 1750 | 21 | 6  |
| 1.2 | ig | 329 | 69  | 0.21 | 0.05 | 0.2981 | 0.6 | 4.41 | 0.8 | 0.1073 | 0.6 | 1754 | 11 | 4  |
| 2   | ig | 384 | 128 | 0.33 | 0.02 | 0.3193 | 1.5 | 4.74 | 1.6 | 0.1077 | 0.6 | 1761 | 11 | -1 |
| 3   | ig | 141 | 44  | 0.31 | 0.00 | 0.3101 | 0.8 | 4.59 | 1.2 | 0.1074 | 0.8 | 1757 | 15 | 1  |



|     |      |      |     |      |      |        |     |      |     |        |     |      |    |    |
|-----|------|------|-----|------|------|--------|-----|------|-----|--------|-----|------|----|----|
| 4   | ig   | 209  | 101 | 0.48 | 0.02 | 0.3347 | 0.7 | 5.01 | 1.0 | 0.1086 | 0.7 | 1776 | 13 | -5 |
| 5   | ig   | 488  | 177 | 0.36 | 0.01 | 0.3216 | 1.2 | 4.84 | 1.4 | 0.1091 | 0.7 | 1785 | 12 | -1 |
| 6   | ig   | 171  | 49  | 0.29 | 0.27 | 0.3103 | 0.8 | 4.69 | 1.3 | 0.1096 | 1.0 | 1793 | 19 | 3  |
| 7.1 | ig   | 712  | 216 | 0.30 | 0.14 | 0.2628 | 0.4 | 3.88 | 0.7 | 0.1071 | 0.5 | 1750 | 9  | 16 |
| 7.2 | bad  | 856  | 7   | 0.01 | 2.66 | 0.2664 | 0.4 | 3.71 | 2.6 | 0.1010 | 2.6 | 1642 | 48 | 8  |
| 8   | ig   | 165  | 49  | 0.30 | 0.35 | 0.3208 | 0.8 | 4.77 | 1.4 | 0.1078 | 1.1 | 1762 | 20 | -2 |
| 9   | ig   | 171  | 58  | 0.34 | 0.08 | 0.3146 | 0.8 | 4.70 | 1.1 | 0.1084 | 0.9 | 1773 | 16 | 1  |
| 10  | rim  | 548  | 1   | 0.00 | 0.08 | 0.2916 | 0.4 | 4.00 | 0.7 | 0.0994 | 0.5 | 1613 | 10 | -2 |
| 11  | ig   | 137  | 45  | 0.33 | 0.06 | 0.3030 | 0.8 | 4.51 | 1.2 | 0.1080 | 0.9 | 1766 | 17 | 4  |
| 12  | rim  | 995  | 4   | 0.00 | 0.07 | 0.2911 | 0.3 | 3.98 | 0.5 | 0.0992 | 0.4 | 1609 | 8  | -2 |
| 13  | mix? | 698  | 2   | 0.00 | 0.14 | 0.3233 | 0.4 | 4.56 | 0.6 | 0.1022 | 0.5 | 1664 | 9  | -8 |
| 14  | mix? | 543  | 1   | 0.00 | 0.03 | 0.3054 | 0.4 | 4.25 | 0.6 | 0.1010 | 0.5 | 1643 | 9  | -4 |
| 15  | mix? | 616  | 4   | 0.01 | 0.29 | 0.3139 | 0.4 | 4.53 | 0.7 | 0.1046 | 0.6 | 1708 | 11 | -3 |
| 16  | mix? | 556  | 1   | 0.00 | 0.06 | 0.2992 | 0.5 | 4.23 | 0.7 | 0.1026 | 0.6 | 1672 | 11 | -1 |
| 17  | bad  | 520  | 1   | 0.00 | 2.59 | 0.3134 | 0.5 | 4.42 | 2.0 | 0.1022 | 1.9 | 1664 | 36 | -5 |
| 18  | rim  | 1102 | 4   | 0.00 | 0.02 | 0.2885 | 0.3 | 3.98 | 0.4 | 0.1001 | 0.3 | 1625 | 6  | -1 |

**SM061r (Augen gneiss; igneous age 1759 +/- 8 Ma (MSWD 1.03); metamorphic age ~1.6 Ga; UTM NAD27 13 T 356260 4548375)**

|      |       |     |     |      |       |        |     |      |     |        |     |      |    |     |
|------|-------|-----|-----|------|-------|--------|-----|------|-----|--------|-----|------|----|-----|
| 1    | bad   | 39  | 6   | 0.14 | 0.79  | 0.3204 | 2.0 | 4.36 | 4.2 | 0.0986 | 3.7 | 1599 | 69 | -11 |
| 2    | ig    | 140 | 40  | 0.29 | 0.15  | 0.3117 | 0.9 | 4.59 | 1.4 | 0.1067 | 1.0 | 1744 | 19 | 0   |
| 3    | rim   | 136 | 12  | 0.09 | 0.20  | 0.2930 | 0.9 | 3.99 | 1.7 | 0.0988 | 1.4 | 1601 | 26 | -3  |
| 4    | ig    | 99  | 25  | 0.25 | 0.00  | 0.3152 | 1.1 | 4.75 | 2.0 | 0.1093 | 1.8 | 1788 | 32 | 1   |
| 5.1  | rxtl? | 277 | 44  | 0.16 | 0.06  | 0.3079 | 0.6 | 4.50 | 0.9 | 0.1061 | 0.7 | 1733 | 13 | 0   |
| 5.2  | bad   | 57  | 5   | 0.08 | 0.54  | 0.2938 | 1.4 | 3.81 | 2.8 | 0.0939 | 2.5 | 1507 | 47 | -9  |
| 6    | ig    | 105 | 23  | 0.22 | -0.18 | 0.3145 | 1.1 | 4.76 | 1.7 | 0.1097 | 1.3 | 1795 | 23 | 2   |
| 7    | ig    | 171 | 41  | 0.24 | 0.12  | 0.3135 | 0.8 | 4.59 | 1.4 | 0.1061 | 1.2 | 1734 | 21 | -1  |
| 8.1  | mix?  | 179 | 27  | 0.15 | 0.01  | 0.2761 | 0.8 | 3.84 | 1.2 | 0.1009 | 0.9 | 1641 | 17 | 4   |
| 8.2  | ig    | 341 | 51  | 0.15 | 0.06  | 0.3039 | 0.6 | 4.47 | 0.9 | 0.1067 | 0.7 | 1744 | 12 | 2   |
| 9.1  | ig    | 229 | 59  | 0.26 | 0.00  | 0.3207 | 0.7 | 4.76 | 1.0 | 0.1077 | 0.7 | 1761 | 13 | -2  |
| 9.2  | ig    | 196 | 38  | 0.19 | 0.02  | 0.3350 | 0.7 | 5.04 | 1.0 | 0.1092 | 0.7 | 1785 | 13 | -4  |
| 10   | rxtl? | 123 | 23  | 0.18 | 0.28  | 0.2795 | 1.0 | 3.89 | 1.8 | 0.1009 | 1.5 | 1641 | 28 | 3   |
| 11   | ig    | 195 | 35  | 0.18 | -0.07 | 0.3133 | 0.8 | 4.63 | 1.1 | 0.1071 | 0.8 | 1751 | 15 | 0   |
| 12   | rxtl? | 313 | 12  | 0.04 | 0.05  | 0.3005 | 0.6 | 4.28 | 0.9 | 0.1034 | 0.7 | 1685 | 13 | 0   |
| 13.1 | ig    | 141 | 27  | 0.19 | 0.00  | 0.3213 | 0.9 | 4.79 | 1.2 | 0.1081 | 0.9 | 1768 | 16 | -2  |
| 13.2 | ig    | 89  | 17  | 0.19 | 0.08  | 0.3235 | 1.2 | 4.73 | 1.8 | 0.1060 | 1.3 | 1731 | 24 | -4  |
| 14   | ig    | 110 | 26  | 0.24 | 0.11  | 0.3115 | 1.1 | 4.66 | 1.7 | 0.1085 | 1.3 | 1774 | 24 | 2   |
| 15.1 | rxtl? | 367 | 36  | 0.10 | -0.04 | 0.3095 | 0.6 | 4.54 | 0.9 | 0.1063 | 0.7 | 1737 | 14 | 0   |
| 15.2 | ig    | 356 | 119 | 0.33 | 0.02  | 0.3199 | 0.6 | 4.72 | 0.8 | 0.1069 | 0.6 | 1748 | 11 | -2  |
| 16.1 | rim   | 99  | 10  | 0.10 | 0.00  | 0.3100 | 1.3 | 4.20 | 2.0 | 0.0982 | 1.4 | 1590 | 27 | -9  |
| 16.2 | ig    | 286 | 80  | 0.28 | -0.05 | 0.3507 | 0.7 | 5.20 | 1.9 | 0.1076 | 1.8 | 1759 | 32 | -9  |
| 17   | ig    | 155 | 47  | 0.30 | 0.37  | 0.3202 | 1.0 | 4.76 | 2.2 | 0.1077 | 1.9 | 1762 | 35 | -2  |
| 18   | ig    | 243 | 45  | 0.18 | 0.09  | 0.3068 | 0.8 | 4.57 | 1.2 | 0.1081 | 0.9 | 1767 | 16 | 2   |
| 19   | rxtl? | 193 | 12  | 0.06 | 0.02  | 0.3048 | 0.8 | 4.38 | 1.3 | 0.1041 | 1.0 | 1699 | 19 | -1  |
| 20   | rxtl? | 165 | 13  | 0.08 | 0.19  | 0.2977 | 0.8 | 4.18 | 1.3 | 0.1017 | 1.1 | 1656 | 20 | -1  |
| 21   | ig    | 107 | 22  | 0.21 | 0.06  | 0.3078 | 1.0 | 4.61 | 1.5 | 0.1086 | 1.0 | 1777 | 19 | 3   |
| 22   | rxtl? | 231 | 18  | 0.08 | 0.08  | 0.3311 | 0.8 | 4.71 | 1.1 | 0.1032 | 0.9 | 1683 | 16 | -9  |

**SM290 (Augen gneiss; igneous age 1766 +/- 10 Ma (MSWD 0.56); metamorphic age 1611 +/- 22 Ma; UTM NAD27 13 T 374272 4540705)**

|     |      |     |     |      |       |        |     |      |     |        |     |      |    |    |
|-----|------|-----|-----|------|-------|--------|-----|------|-----|--------|-----|------|----|----|
| 1   | ig   | 484 | 104 | 0.22 | 0.06  | 0.3078 | 0.5 | 4.57 | 0.7 | 0.1078 | 0.5 | 1762 | 9  | 2  |
| 2.1 | ig   | 255 | 40  | 0.16 | -0.04 | 0.3144 | 0.7 | 4.69 | 1.1 | 0.1081 | 0.9 | 1768 | 16 | 0  |
| 2.2 | met  | 864 | 1   | 0.00 | 0.00  | 0.2992 | 0.4 | 4.19 | 0.6 | 0.1015 | 0.4 | 1651 | 8  | -2 |
| 3   | ig   | 334 | 115 | 0.34 | 0.07  | 0.2973 | 0.6 | 4.42 | 0.9 | 0.1077 | 0.6 | 1761 | 12 | 5  |
| 4   | rim? | 376 | 3   | 0.01 | 0.03  | 0.2813 | 0.5 | 3.85 | 0.8 | 0.0993 | 0.6 | 1611 | 11 | 1  |
| 5   | ig   | 356 | 56  | 0.16 | 0.02  | 0.3110 | 0.6 | 4.64 | 0.8 | 0.1082 | 0.6 | 1769 | 10 | 1  |
| 6   | ig   | 296 | 51  | 0.17 | 0.02  | 0.3102 | 0.6 | 4.64 | 0.9 | 0.1084 | 0.6 | 1773 | 11 | 2  |
| 7   | ig   | 180 | 42  | 0.23 | 0.05  | 0.3119 | 0.8 | 4.68 | 1.1 | 0.1089 | 0.8 | 1780 | 15 | 2  |
| 8   | rxlt | 284 | 40  | 0.14 | 0.34  | 0.3034 | 0.6 | 4.45 | 1.0 | 0.1064 | 0.8 | 1739 | 15 | 2  |
| 9   | ig   | 175 | 26  | 0.15 | 0.55  | 0.3015 | 0.7 | 4.51 | 1.4 | 0.1086 | 1.2 | 1776 | 21 | 5  |
| 10  | ig   | 197 | 25  | 0.13 | 0.12  | 0.3056 | 0.8 | 4.60 | 1.2 | 0.1091 | 0.9 | 1784 | 16 | 4  |
| 11  | ig   | 496 | 86  | 0.17 | 0.00  | 0.3105 | 0.5 | 4.62 | 0.7 | 0.1078 | 0.5 | 1763 | 9  | 1  |
| 12  | ig   | 496 | 88  | 0.18 | 0.02  | 0.3075 | 0.5 | 4.55 | 0.7 | 0.1074 | 0.5 | 1755 | 9  | 2  |
| 13  | ig   | 607 | 152 | 0.25 | 0.05  | 0.3166 | 0.4 | 4.71 | 0.6 | 0.1078 | 0.4 | 1763 | 8  | -1 |

**SM058 (Metawacke leucosome; anatectic age 1747 +/- 7 Ma (MSWD 0.63); UTM NAD27 13 T 354974 4548522)**

|      |       |     |     |      |      |        |     |      |     |        |     |      |     |    |
|------|-------|-----|-----|------|------|--------|-----|------|-----|--------|-----|------|-----|----|
| 1.1  | ig    | 85  | 27  | 0.31 | 0.18 | 0.2838 | 1.1 | 4.18 | 2.1 | 0.1068 | 1.8 | 1745 | 32  | 8  |
| 1.2  | ig    | 297 | 56  | 0.19 | 0.05 | 0.3097 | 0.6 | 4.62 | 0.8 | 0.1081 | 0.6 | 1767 | 11  | 2  |
| 2.1  | ig    | 171 | 112 | 0.66 | 0.94 | 0.2944 | 0.8 | 4.29 | 1.9 | 0.1058 | 1.8 | 1728 | 32  | 4  |
| 2.2  | ig    | 297 | 27  | 0.09 | 0.05 | 0.3112 | 0.6 | 4.57 | 0.8 | 0.1066 | 0.6 | 1742 | 11  | 0  |
| 3    | ig    | 261 | 40  | 0.15 | 0.05 | 0.3119 | 0.6 | 4.62 | 1.0 | 0.1074 | 0.8 | 1756 | 14  | 0  |
| 4    | ig    | 344 | 45  | 0.13 | 0.02 | 0.3143 | 0.5 | 4.63 | 0.8 | 0.1068 | 0.5 | 1746 | 10  | -1 |
| 5    | rxlt? | 335 | 36  | 0.11 | 0.08 | 0.3047 | 0.5 | 4.41 | 0.8 | 0.1049 | 0.6 | 1713 | 11  | 0  |
| 6    | ig    | 247 | 45  | 0.18 | 0.49 | 0.3008 | 0.7 | 4.41 | 1.2 | 0.1064 | 1.0 | 1739 | 18  | 3  |
| 7    | ig    | 319 | 42  | 0.13 | 0.07 | 0.3055 | 0.5 | 4.47 | 0.8 | 0.1062 | 0.6 | 1734 | 11  | 1  |
| 8    | ig    | 338 | 98  | 0.29 | 0.89 | 0.2853 | 0.5 | 4.19 | 1.7 | 0.1065 | 1.7 | 1741 | 31  | 8  |
| 9    | ig    | 276 | 45  | 0.16 | 0.01 | 0.3067 | 0.6 | 4.53 | 0.8 | 0.1072 | 0.6 | 1752 | 11  | 2  |
| 10.1 | bad   | 130 | 25  | 0.19 | 2.71 | 0.2958 | 1.0 | 4.24 | 5.5 | 0.1039 | 5.4 | 1694 | 100 | 1  |
| 10.2 | ig    | 383 | 73  | 0.19 | 0.01 | 0.3126 | 0.5 | 4.60 | 0.7 | 0.1066 | 0.5 | 1743 | 9   | -1 |
| 11   | ig    | 79  | 43  | 0.54 | 0.20 | 0.2917 | 1.1 | 4.33 | 1.7 | 0.1077 | 1.3 | 1760 | 24  | 7  |
| 12   | rim   | 167 | 11  | 0.06 | 0.09 | 0.2905 | 0.7 | 4.05 | 1.1 | 0.1012 | 0.9 | 1646 | 16  | 0  |
| 13   | ig    | 96  | 32  | 0.33 | 0.10 | 0.2781 | 1.0 | 4.15 | 1.5 | 0.1082 | 1.2 | 1770 | 21  | 12 |
| 14   | ig    | 195 | 93  | 0.48 | 0.05 | 0.3076 | 0.7 | 4.50 | 1.0 | 0.1062 | 0.7 | 1735 | 13  | 0  |
| 15   | ig    | 177 | 416 | 2.35 | 2.21 | 0.2534 | 0.8 | 3.68 | 2.4 | 0.1053 | 2.3 | 1719 | 43  | 18 |

**Notes:**

\* common Pb.

# atomic ratios corrected for initial Pb using amount of <sup>204</sup>Pb and corresponding average Earth values from Stacey and Kramers (1975)

§ errors given at 1 sigma level

† degree of discordance, percentage of distance that analysis lies along a chord from its extrapolated intersection with concordia (corresponding to its <sup>207</sup>Pb/<sup>206</sup>Pb age) to the origin at 0 Ma.

Interpretation: ig = igneous crystallization age; rim = metamorphic rim; rxlt = metamorphic recrystallization; bad = bad data point (high errors or common Pb);

mix = multiple age domains

**Table A-2: U-Pb CA-ID-TIMS zircon data**

**SM009 Fe-rich orthoamphibolite (UTM NAD27 13 T 356653 4545464)**

**1764.2±1.4 (MSWD = 1.5) 4 point\* weighted 207Pb/206Pb date, Concordia Age = 1763.1 ±1.6 Ma (MSWD = 0.14)**

| Sample | Weight<br>(µg) | U<br>(ppm) | sample Pb |      | initial Pb |      | Pb*<br>Pbc | Corrected atomic ratios |                |                      |        |                      |        |                       |        | 206/238<br>Age (Ma) | 207/235<br>Age (Ma) | 207/206<br>Age (Ma) | err  | Rho  | % disc. |
|--------|----------------|------------|-----------|------|------------|------|------------|-------------------------|----------------|----------------------|--------|----------------------|--------|-----------------------|--------|---------------------|---------------------|---------------------|------|------|---------|
|        |                |            | (ppm)     | (pg) | (ppm)      | (pg) |            | 206Pb<br>204Pb          | 208Pb<br>206Pb | 206Pb/238U<br>(rad.) | %err   | 207Pb/235U<br>(rad.) | %err   | 207Pb/206Pb<br>(rad.) | %err   |                     |                     |                     |      |      |         |
| sA aa* | 8.48           | 69.5       | 23.0      | 195  | 0.35       | 2.9  | 29.9       | 3682                    | 0.10           | 0.3144               | (0.09) | 4.6790               | (0.12) | 0.1079                | (0.08) | 1762.3              | 1763.5              | 1765.0              | ±1.5 | 0.73 | 0.18    |
| sB aa* | 8.07           | 60.3       | 19.7      | 159  | 0.00       | 0.0  | 75.0       | 2.2E+06                 | 0.10           | 0.3143               | (0.07) | 4.6771               | (0.09) | 0.1079                | (0.06) | 1762.1              | 1763.2              | 1764.4              | ±1.1 | 0.76 | 0.16    |
| sC aa* | 7.34           | 33.8       | 11.1      | 81   | 0.00       | 0.0  | 26.3       | 2.8E+06                 | 0.10           | 0.3146               | (0.06) | 4.6760               | (0.14) | 0.1078                | (0.11) | 1763.3              | 1762.9              | 1762.5              | ±1.9 | 0.68 | -0.05   |
| sE     | 9.15           | 102.8      | 33.8      | 309  | 0.17       | 1.6  | 60.9       | 11039                   | 0.10           | 0.3135               | (0.06) | 4.6557               | (0.08) | 0.1077                | (0.05) | 1758.1              | 1759.3              | 1760.7              | ±1.0 | 0.77 | 0.17    |
| sG*    | 3.41           | 143.9      | 47.4      | 162  | 0.11       | 0.4  | 41.7       | 523                     | 0.11           | 0.3146               | (0.09) | 4.6796               | (0.13) | 0.1079                | (0.09) | 1763.4              | 1763.6              | 1763.8              | ±1.6 | 0.74 | 0.02    |

**Notes:** sample: s\_=single grain, aa=mechanically air abraded, \*used in age calculations

Weight: represents estimated weight prior to first step of CATIMS dissolution. U and Pb concentrations are based on this weight and the U and Pb atoms measured from the second dissolution step only. The U and Pb concentrations may be underestimations, depending on how much material was dissolved and leached in the first step. They are useful for internal comparisons however. Picograms (pg) sample and initial Pb from the second dissolution step are measured directly.

sample Pb: sample Pb (radiogenic + initial) corrected for laboratory blank

initial Pb: common Pb corrected for laboratory blank of 3.5 pg Pb for zircon analyses.

Pb\*/Pbc: radiogenic Pb to total common Pb (blank + initial)

Corrected atomic ratios: <sup>206</sup>Pb/<sup>204</sup>Pb corrected for blank, mass discrimination and tracer, all others corrected for blank, mass discrimination, tracer and initial Pb, values in parentheses are 2 sigma errors in percent.

Rho: <sup>206</sup>Pb/<sup>238</sup>U vs <sup>207</sup>Pb/<sup>235</sup>U error correlation coefficient

% disc.: percent discordant

Zircon dissolution and chemistry were adapted from methods developed by Krogh (1973), Parrish et al. (1987) and Mattinson (2005). All zircons were chemically abraded (CATIMS). Final dissolutions were spiked with a mixed <sup>205</sup>Pb/<sup>233</sup>U/<sup>235</sup>U tracer (ET535). Pb and U samples were loaded onto single rhenium filaments with silica gel and graphite, respectively; isotopic compositions were measured in multi-collector, static mode on a Micromass Sector 54 thermal ionization mass spectrometer at the University of Wyoming with <sup>204</sup>Pb in Daly-photomultiplier collector and all other isotopes in Faraday collectors. Mass discrimination of 0.059 ± 0.05 %/amu for Pb was determined by replicate analyses of NIST SRM 981. U fractionation was determined internally during each run. Procedural blanks averaged 3.5 pg Pb during the course of the study. Isotopic composition of the Pb blank was estimated as 19.09±0.5, 15.652±0.2, and 38.81±.2 for 206/204, 207/204 and 208/204, respectively. U blanks were consistently less than 0.6 pg. Concordia coordinates, intercepts, and uncertainties were calculated using MacPBDAT and ISOPLOT programs (based on Ludwig 1988, 1991); initial Pb isotopic compositions were estimated by Stacey and Kramers (1975) model. The decay constants used by MacPBDAT are those recommended by the I.U.G.S. Subcommittee on Geochronology (Steiger and Jäger, 1977): 0.155125 x 10<sup>-9</sup>/yr for <sup>238</sup>U, 0.98485 x 10<sup>-9</sup>/yr for <sup>235</sup>U and present-day <sup>238</sup>U/<sup>235</sup>U = 137.88.
